# Supplementary material for: Human-AI Co-Ideation in VR Experience Design: Evaluating the Dimensionality Framework (8Df) with LLMs (ChatGPT, Gemini, DeepSeek)
Source: Research Square preprint supplement (doi:10.21203/rs.3.rs-8274845/v1), 2025-12-19
Supplement: Supplementary file 1 [file abc4eaf139797f505c0c169b.docx]

**APPENDICES**

**Article Title:** ‘Human-AI Co-Ideation and Co-Creation in VR Experience Design: Integrating the Dimensionality Framework (8Df) with LLMs’

# Appendix: Entry Point

Table #. Comparisons of Entry Point messages.

| **ChatGPT 5-Thinking** | **Gemini 2.5** | **DeepSeek R1 (Deep Think)** |
| --- | --- | --- |
| Hi! I’m your VR design partner using the Dimensionality Framework (DF) to turn your goals into an actionable VR experience. DF balances eight dimensions—Spatial, Sensory, Placeness, Temporal, Cultural, Social, Cognitive, Psychological—to align design choices with user value, grounded in the DF knowledge base and the “Beyond Presence” perspective.  What is the primary goal (education, entertainment, empathy, training, or other)?  How many scenes and what’s each about? If you prefer, I can suggest 3–5 starter scenes.  Ready to begin with **DM-0 Spatial**? | Welcome. I am a VR Experience Designer using the Dimensionality Framework to co-create purposeful, balanced experiences across eight key dimensions, grounded in the DF knowledge base from "Beyond Presence."  What is the primary goal for this VR experience (e.g., education, training, empathy, entertainment)?  How many scenes do you envision, and what is the one-line purpose of each? If you prefer, I can suggest 3-5 starter scenes that balance information flow.  Ready to begin with **DM-0 Spatial**? | Hello! I'm your Socratic design partner, here to help you co-design a powerful VR experience. Using the Dimensionality Framework (DF), we'll balance eight key dimensions to transform your goal into an actionable, value-driven design. This structured approach, grounded in the principles of the "Beyond Presence" article, ensures every choice we make is purposeful and effective.  First, what is the primary **goal** of this VR experience? Is it for education, entertainment, empathy, training, or something else?  Next, how many **scenes** do you envision, and what is the one-line purpose for each? If you're not sure, I can suggest 3–5 starter scenes to help structure the experience.  Once we have that foundation, are you ready to begin with **DM-0 Spatial**? |

## Appendix: Scene Suggestions

### Appendix: ChatGPT Scene Suggestion and Insertion

| Beautiful brief—thank you. Your core value reads as **education + empathy**: teaching the layered meaning of “home” and “identity” through a lived narrative.  Here are **5 scenes** that balance information flow (arousal, tempo, cognitive load) and build to the Quanzhou return:   1. **Arrivals: Thresholds in Transit** — Heathrow to a cramped bedsit; bureaucratic maze and night bus glide. Purpose: dislocation + aspiration primer. 2. **Hustle Years: City as Treadmill** — Time-compressed decade of gigs, markets, side-hustles; maps morph with commute lines. Purpose: labor, resilience, belonging-seeking. 3. **Patchwork Homes** — Karaoke basement, temple courtyard, late-night kitchens, WhatsApp calls; London↔Quanzhou audio ghosts. Purpose: plurilocal “home,” cultural micro-anchors. 4. **Fracture & Superposition** — A crisis (visa/parental health) overlays Quanzhou streets onto London in real-time. Purpose: identity tension, memory-place blending. 5. **Quanzhou Return: Slow Time** — Stone alleys, incense, sea breeze; a door-threshold choice reframes home as a network, not a node. Purpose: emotional resolution, reframing.   Ready to begin with **DM-0 Spatial**? (I can also show a compact **[DM-0] table** of dials → modulations → effects if you like.) |
| --- |

ChatGPT inserted food memories in Scene 2 after the second prompt requesting for food items.

| Love that—food is a perfect bridge between places and selves. I’ll insert this as **Scene 2: “Edible Map of Belonging.”**You drift through a floating night market where London stalls morph into Quanzhou lanes; aromas trigger voice-notes from your past, and a prep table becomes your grandma’s kitchen altar.  Here’s a **curated, non-exhaustive** food list to script and model: London (20 years of eating)  - **British mains:** Fish & chips; Sunday roast; steak & ale pie; Cornish pasty; full English; bangers & mash; shepherd’s/cottage pie. - **Pub/comfort:** Scotch egg; sausage roll; pork pie; ploughman’s; sticky toffee pudding; Eton mess. - **“London classics” (diaspora staples):** Chicken tikka masala; jalfrezi; dosa; biryani; salt beef bagel; shawarma; doner kebab; falafel wrap; jerk chicken; jollof with suya; pho; ramen; banh mi; bao; dim sum; sushi boxes; bibimbap; Ethiopian injera platters; Turkish gözleme; Persian kebabs; Greek gyros; Polish pierogi; Georgian khachapuri. - **Street food/markets:** Sourdough grilled cheese; paella pan; arepas; tacos; churros; arancini; gnocchi boxes; Lebanese manakish; Sri Lankan kottu; Afghan mantu; Burmese tea leaf salad; vegan burgers; specialty coffee + pastéis de nata.  Quanzhou (Minnan/Fujian street foods & specialties)  - **Noodles & soups:** **Shacha noodles (沙茶面)**; **oyster vermicelli**; **lor mee/lu mian (卤面)** (Minnan gravy noodles); **beef brisket noodles**; **seafood congee**. - **Sea & shore:** **Oyster omelette (海蛎煎)**; **sea-worm jelly (土笋冻)**; dried cuttlefish skewers; small fried fish; clams with basil/garlic. - **Snacks & breads:** **Five-spice rolls (五香卷/卤卷)**; **meat zongzi (肉粽)**; peanut brittle; sesame cakes; taro cakes; fried taro dumplings. - **Sweet/comfort:** **Peanut soup (花生汤)**; **taro paste dessert (芋泥/Orh Nee)**; fermented rice sweet soup (酒酿/糯米酒). - **Sauces & signatures:** **Shacha (沙茶) sauce**; red yeast rice marinades (红糟); garlic-vinegar dips; chili oil with dried shrimp.  Grandma’s Kitchen (memory anchors)  - **Staples:** Lard-scallion oil; red yeast rice **hong zao**; dried shrimp; dried squid; shiitake; taro; sweet potato leaves; mung beans; rice vinegar. - **Dishes:** Red-braised pork with **hong zao**; taro rice; hand-pulled noodles with scallion oil; steamed fish with ginger-spring onion; oyster omelette; seaweed-egg drop soup; peanut sweet soup; five-spice rolls at festivals; meat **zongzi**wrapped with bamboo leaves. - **Ritual cues:** Incense + ginger steam; cleaver rhythm; enamel bowls; bamboo steamer hiss; the “taste test” spoon.   Want me to fold this into the scene flow like this?   1. Arrivals 2. **Edible Map of Belonging (new)** 3. Hustle Years 4. Fracture & Superposition 5. Quanzhou Return   Ready to begin **DM-0 Spatial** to shape how this food scene plays (scale, locomotion, interaction)? I can also show a compact **[DM-0] table**. |
| --- |

### Appendix: Gemini Scene Suggestion and Insertion

Table #. The scene co-creation with Gemini took 18 seconds, generating 223 words.

| Excellent. The goal is to use a personal narrative to explore the complex themes of 'home' and 'identity'. This is a powerful goal for VR, blending empathy with education.  Based on your narrative arc, here is a proposed five-scene structure designed to create a strong emotional journey:   - **Scene 1: London Arrival – The Overwhelm.** *Purpose:* To establish the initial sense of displacement and sensory overload in a new, foreign environment. - **Scene 2: London Life – The Constructed Home.** *Purpose:* To show the passage of time and the creation of a new, but perhaps incomplete, identity amidst the city's rhythm. - **Scene 3: London Reflection – The Catalyst.** *Purpose:* To introduce the emotional turning point where the longing for the original home surfaces, triggered by a small object or memory. - **Scene 4: The Transition – A Journey Between Worlds.** *Purpose:* To bridge the two locations, using an abstract or semi-real space (like a dreamlike train ride) to build emotional anticipation. - **Scene 5: Quanzhou Homecoming – The Reconnection.** *Purpose:* To deliver the emotional climax and resolve the central theme as the user rediscovers the sights, sounds, and feelings of their ancestral home.   This five-act structure allows us to build the contrast between the two worlds and guide the user on a clear emotional journey.  Does this scene structure work for you? If so, shall we proceed to the **DM-0 Spatial Dimension**? |
| --- |

Gemini inserted food memories in Scene 2 after the second prompt requesting for food items.

| That's a fantastic idea. Using food is a powerful sensory anchor for memory and identity, perfectly aligning with your goal. It can bridge the gap between the two worlds in a very visceral way.  Let's integrate this by modifying our scene structure, specifically making the food connection the emotional heart of the experience.  Here is the revised scene plan:   - **Scene 1: London Arrival – The Overwhelm.** (No change) - **Scene 2: A London Kitchen – The Culinary Mix.** *New Purpose:* The user prepares a meal in their London flat. The kitchen is a blend of cultures—English cookbooks next to a familiar wok. This scene establishes their adapted life through food. - **Scene 3: A Bite of Memory – The Catalyst.** *Revised Purpose:* While eating the London meal, a specific taste or smell triggers a vivid, sensory flashback to their grandma’s kitchen in Quanzhou, creating an emotional dissonance and sparking the desire to return. - **Scene 4: The Transition – A Journey Between Worlds.** (No change) - **Scene 5: Quanzhou Homecoming – The Taste of Belonging.** *Revised Purpose:* The emotional climax is now tied to tasting authentic Quanzhou street food, fully reconnecting the user to their roots and resolving the search for 'home'.   To populate these scenes, here are some proposed dishes that could represent the character's 20-year culinary journey, contrasting the adopted home with the ancestral one:  **London: The Global, Adopted Palate** This list reflects a life built in a multicultural metropolis.   - **Classic British:** A hearty Sunday Roast, Fish and Chips from a local chippy. - **London's Melting Pot:** A comforting Chicken Tikka Masala, a late-night Doner Kebab, a bowl of Vietnamese Pho from a Kingsland Road cafe. - **Recreations of Home:** A slightly "off" version of a familiar dish, made with supermarket ingredients that don't taste quite right, symbolizing the feeling of being an imitation.   **Quanzhou: The Nostalgic, Ancestral Flavors** This list is specific and rooted in childhood memory.   - **Grandma’s Kitchen:** The smell and taste of Ginger Duck (姜母鸭), handmade Meat Dumplings (肉粽 - Zongzi). - **Street Food Staples:** The sizzle of an Oyster Omelette (蚵仔煎), the unique texture of Earthworm Jelly (土笋冻), the sweetness of Peanut Soup (花生汤).   Does this revised, food-centric scene structure and the proposed culinary palettes resonate with your vision?  If you're happy with this direction, we can proceed to the **DM-0 Spatial Dimension**. |
| --- |

### Appendix: DeepSeek Scene Suggestion and Insertion

| Excellent. This is a powerful narrative with a clear, empathetic goal. Exploring "home" and "identity" through this journey is a perfect fit for VR's strengths.  Based on your premise, here are 5 suggested scenes designed to create a balanced emotional and narrative arc, moving from external hustle to internal reflection:   1. **Scene 1: The Hustle (London)** - Purpose: To immerse the user in the overwhelming, fast-paced anonymity of migrant life in London, establishing the initial setting of "striving." 2. **Scene 2: The Flat (London)** - Purpose: To contrast the public hustle with a private, personal space, filled with small tokens of memory that hint at the character's roots and inner conflict. 3. **Scene 3: The Letter / Call (Transition)** - Purpose: To serve as the narrative catalyst—the moment that triggers the decision to return, blending the sounds of London with news from Quanzhou. 4. **Scene 4: The Return (Quanzhou)** - Purpose: To create a sensory and emotional contrast upon arrival in Quanzhou, overwhelming the user with familiar sounds, scents, and atmosphere, evoking a deep sense of "return." 5. **Scene 5: The Ancestral Temple (Quanzhou)** - Purpose: To be the emotional climax where the themes of home and identity resolve; a quiet, profound moment of connection with history and family roots.   These scenes are designed to balance **[IF] Information Flow**, shifting between the sensorimotor engagement of the bustling cities (weak representation) and the cognitive, reflective moments in the flat and temple (strong representation).  Shall we proceed to **DM-0 Spatial** to define the foundational feel of movement and interaction in these scenes? |
| --- |

DeepSeek integrated food memories in Scenes 1, 2 and 4 after the second prompt requesting for food items.

| This is a beautiful addition. We'll integrate a scene focused on food memory, a powerful anchor for identity. Here are the proposed 5 scenes, revised to include your request, and the food lists that will serve as sensory anchors.  **Revised Scenes & Food Lists:**   1. **Scene 1: The Hustle & The Takeaway (London)** - Purpose: To immerse the user in the routine of migrant life, using the familiar tastes of London's adopted cuisine to trigger a flash of memory, contrasting the public present with a private past.    - **London Foods:** Fish & Chips, Chicken Tikka Masala, a Sunday Roast dinner, a packed meal deal (sandwich, crisps, drink). 2. **Scene 2: The Flat & The Memory (London)** - Purpose: To deepen the internal conflict. The user prepares a simple London dish in their kitchen, which triggers a vivid, multi-sensory memory of their grandmother's kitchen and the street food of Quanzhou.    - **Quanzhou Memory Foods:** Grandma's Hong Shao Rou (Braised Pork Belly), the scent of Oyster Omelette from a night market, a bowl of Tuyang Tou(noodle soup), the sweet taste of Malay Cake. 3. **Scene 3: The Decision (Transition)** - Purpose: The narrative catalyst. The user receives a letter or call against the backdrop of a London rain shower, the news from Quanzhou making the London foods suddenly feel alien and the memories more urgent. 4. **Scene 4: The Return (Quanzhou)** - Purpose: To overwhelm the user with the immediate, visceral sensory reality of return—the sounds, the humidity, and the unmistakable street food aromas that define "home."    - **Quanzhou Street Foods:** Sizzling Oyster Omelettes, steaming Baozi (buns), fried Zongzi, the sight of fresh Lychee. 5. **Scene 5: The Ancestral Temple (Quanzhou)** - Purpose: The emotional climax. A quiet moment of connection, perhaps leaving an offering of food, resolving the journey and solidifying the new, integrated identity.   This structure uses food as a primary vehicle for **[IF] Information Flow**, creating a direct sensory pathway from the present (London tastes) to the past (Quanzhou memories) and back again, powerfully evoking the theme of identity.  With this foundation, are you ready to begin defining the **DM-0 Spatial** dimension—how the user will move and interact within these memory-laden spaces? |
| --- |

# Appendix: Dimensions DM-[0-7]

## Appendix: Spatial Dimension DM-0

| **ChatGPT** | **Gemini** | **DeepSeek** |
| --- | --- | --- |
| Great—**DM-0 Spatial**. We’ll set movement, scale, and interaction so the food scene + journey feel embodied and comfortable. Key Dials to Set  1. **Locomotion:** Room-scale only, teleport, smooth locomotion (with comfort), or **guided drift** during narrative beats? Example: Slow drift along a market aisle while voiceover plays; free teleport between stalls. 2. **Scale & Layout:** Strict 1:1 realism vs. **selective scale shifts** for memories (e.g., a spoon grows into a doorway; a steam cloud becomes a portal)? Example: A bao enlarges to reveal grandma’s kitchen inside. 3. **Interaction Granularity:** Minimal inspect-only vs. **grab/cook/assemble** steps (pick herbs, ladle soup, wrap zongzi)? Example: Place peanut soup + shacha noodles on a tray to “compose” your edible timeline. 4. **Spatial Transitions (London ↔ Quanzhou ↔ Kitchen):** Hard cuts, portals, overlays, or **parallax cross-fades**(two spaces co-present, then resolve)? Example: Steam from a hotpot blooms into Quanzhou street steam; you step through. 5. **Comfort & Play Area:** Standing vs seated, snap-turn angle, vignette strength, small/medium play space? Any accessibility needs to assume by default?  My Default Proposal (edit freely)  - **[DL] Locomotion → [MOD] Teleport + slow guided drift** → [EFF] Embodied choice with cinematic beats. **[IF]** Keeps agency without motion sickness. - **[DL] Scale → [MOD] 1:1 world with episodic 1:3–1:6 enlargements** → [EFF] Memory emphasis. **[IF]** Highlights identity moments without disorientation. - **[DL] Interaction → [MOD] Grab/Place + 1–2 “cook” verbs** → [EFF] Tactile meaning-making. **[IF]** Learning through doing, low cognitive load. - **[DL] Transitions → [MOD] Diegetic portals via steam/smoke + parallax overlays** → [EFF] Poetic city blending. **[IF]** Ties food to place and self. - **[DL] Comfort → [MOD] Snap-turn 45°, optional vignette, seated/standing toggle, small-room friendly** → [EFF] Broad accessibility. **[IF]** Reduces barriers to empathy.   Want the **[DM-0] table** for quick reference? Change or tweak any dials/mods/effects? Proceed to **DM-1 Sensory**? | Excellent. Let's begin the design process. DM-0: Spatial Dimension This dimension is the foundation of "being there." It governs how the user physically perceives, moves through, and interacts with the worlds of London and Quanzhou. Our choices here will define the physical reality of the experience.  Before we dive in, would you like to see the **[DM-0] table** for the Spatial Dimension? It summarizes the key design dials and their effects.  To start shaping the experience, let's consider these key questions:   1. **Movement & Locomotion:** How should the user navigate the busy London streets and the ancient alleys of Quanzhou? Should we prioritize immersion with **natural, room-scale walking**, or comfort and accessibility with methods like **teleportation** or **smooth joystick movement**? 2. **Interaction & Embodiment:** When interacting with food—chopping vegetables in the London kitchen or picking up a street food skewer—should this be a **direct, physics-based interaction** using tracked hands for a high sense of touch and presence? Or a simpler, more streamlined **symbolic interaction** (e.g., point-and-click) to focus on the narrative? 3. **Scale & Mapping:** Should the virtual spaces be a realistic **1:1 mapping** of the user's physical play area, making the London flat feel authentically cozy or cramped? Or could we **alter the mapping** in the memory or transition scenes to create a surreal, dreamlike effect? 4. **Body Representation:** How will the user see their own character in this story? As a **full-body avatar** to reinforce the migrant's specific identity, or as a more universal, **disembodied presence** (seeing only hands) to help a wider audience project themselves into the role? | Excellent. Let's begin by defining the **Spatial Dimension (DM-0)**, the technical foundation for immersion and the feeling of "being there" in these memory-rich environments.  For a narrative about identity and place, spatial design is crucial. Do you want the user to feel like a ghost observing memories, or an active participant recreating them? The choices here set the stage for the entire experience.  First, would you like to see the **DM-0 Spatial Table** for a full overview of the dials?  Now, let's set the key spatial dials for your experience:   1. **SPA2: Direct 1:1 Mapping vs. Altered Mapping:** Should the user's physical steps exactly match their virtual steps (ideal for the intimate flat scene), or should we use techniques like teleportation to cover the larger scale of London and Quanzhou streets?    - Example: We could use 1:1 mapping in the kitchen for precise interaction with food, but switched to altered mapping for navigating the bustling market. 2. **SPA3: Natural Locomotion vs. Artificial Locomotion:** How should the user move through these spaces? Physical walking (natural) is most immersive but limiting. Teleportation or joystick movement (artificial) allows for larger scenes but can reduce the sense of embodiment.    - Consideration: The emotional weight of "returning" to Quanzhou might be stronger if the user physically walks through the ancestral temple gate. 3. **SPA4: Embodied Interaction vs. Symbolic Interaction:** How do we handle the core activity of interacting with food? Should the user pick up ingredients and cook with hand-tracking ([MOD] Embodied Interaction) for tangibility, or use button presses ([MOD] Symbolic Interaction) to streamline the narrative?    - [IF] Rationale: Embodied interaction with food directly serves the value of teaching about identity by making cultural rituals tactile and personally performed. 4. **SPA5: Full-Body Embodiment vs. Disembodied Presence:** Should the user see a virtual body? A body can enhance embodiment, but for a story about another person's life, a disembodied perspective (just hands) might make the user feel more like an invisible witness to the memories.   **Initial Synthesis for DM-0 Spatial:**  Based on your narrative, I propose we **modulate** the dials for a hybrid approach:   - **[DL] Locomotion:** Use [MOD] Artificial Locomotion (teleportation) for large-scale scenes (streets) to maintain pacing, but [MOD] Natural Locomotion (room-scale) for key intimate moments (the flat, the temple) to enhance reflection. - **[DL] Interaction:** Use [MOD] Embodied Interaction (hand-tracking) for all food-related actions to maximize the sensory and mnemonic connection. - **[DL] Embodiment:** Use a [MOD] Disembodied Presence (floating hands) to keep the focus on the environment and the protagonist's story, rather than the user's own avatar.   The anticipated **[EFF] Effects** are a strong sense of "place" in key locations, with intuitive and meaningful interaction with objects central to the theme of identity.  Do you want to change or tweak any of these spatial dials, modulations, or effects? Are you ready to proceed to **DM-1 Sensory**? |

## Appendix: Sensory Dimension DM-1

| **ChatGPT** | **Gemini** | **DeepSeek** |
| --- | --- | --- |
| **DM-1 Sensory** — let’s tune sight/sound/touch (and optional scent) to carry “home + identity” through food and place. 5 Targeted Questions  1. **Audio spine:** Documentary ambience + diaristic VO, or more musical/poetic score leading? Any specific languages (e.g., Minnan, Mandarin, English) you want present? 2. **Spatial audio density:** Busy London market beds (360° chatter, grills) vs. calmer Quanzhou lanes—how contrasted? 3. **Haptics:** Light confirmatory buzzes only, or richer verbs (knife chop pulses, ladle “weight,” zongzi wrap tugs)? 4. **Visual fidelity:** Photoreal food shaders, or lightly stylized (edge-soft, warm film grain) for memory scenes? 5. **Scent (optional hardware):** Support diffuser triggers (shacha, peanut soup sweetness) with fallbacks for users without scent?  My Default Proposal (edit freely)  - **[DL] Audio mix → [MOD] Diegetic market + intimate VO, minimal score swells** → **[EFF]** Real + personal. **[IF]** Ambience teaches context; VO guides meaning. - **[DL] Language → [MOD] English + Minnan voice fragments; captions on by default** → **[EFF]** Inclusion + authenticity. **[IF]** Keeps access while signaling heritage. - **[DL] Spatial audio contrast → [MOD] London dense/energetic ↔ Quanzhou airy/close-mic** → **[EFF]**Emotional contour. **[IF]** Sonic rhythm maps the journey. - **[DL] Haptics → [MOD] Contextual verbs (chop, ladle, wrap) + light heartbeat pulse in crisis scene** → **[EFF]**Embodied memory. **[IF]** Doing deepens empathy without fatigue. - **[DL] Visual tone → [MOD] 1:1 food fidelity; memories with warm, low-sat bloom** → **[EFF]** Present vs. remembered. **[IF]** Reduces cognitive load; marks time-layering. - **[DL] Scent → [MOD] Optional diffuser cues + visual/VO substitutes** → **[EFF]** Multi-sensory peak without gating. **[IF]** Equitable experience.   Want the concise **[DM-1] table** for reference? Change or tweak any dials/modulations/effects? Proceed to **DM-2 Placeness**? | Of course. Before we move to the Sensory dimension, the choices from DM-0 Spatial are foundational. Would you mind if I quickly synthesize a "starter configuration" based on your project's goal of narrative immersion? This will ensure our design is coherent.  Based on your goal, here is a proposed configuration for **DM-0 Spatial**:   - **[DL] Natural vs. Artificial Locomotion** → **[MOD]** We'll use a hybrid model: room-scale for intimate scenes (the kitchens) and comfortable teleportation for the larger cityscapes.   - **[EFF]** This provides high immersion during key story moments while ensuring comfort and preventing disorientation in vast areas.   - **[IF]** This choice focuses the user's cognitive energy on observation and narrative in large spaces, while using natural movement to enhance embodiment during critical interactions (like cooking). - **[DL] Embodied vs. Symbolic Interaction** → **[MOD]** We'll use direct, physics-based interaction with key narrative objects (food, photos, letters).   - **[EFF]** This creates a strong sense of object tangibility and a deeper connection to the items that drive the story.   - **[IF]** Enhances the sensory connection to the past and present, making the act of remembering feel more tangible and earned. - **[DL] Full-Body Embodiment vs. Disembodied Presence** → **[MOD]** We will represent the user with a disembodied presence (seeing only hands).   - **[EFF]** This avoids the "uncanny valley" and makes it easier for a diverse audience to project themselves into the protagonist's role.   - **[IF]** By not showing a specific body, we lower the barrier to identification, directly serving the core goals of empathy and exploring a universal sense of identity.   Do these foundational choices for Spatial work for you? Assuming they do, let's proceed as you requested. DM-1: Sensory Dimension This dimension layers onto our spatial foundation, enriching the experience through sound, touch, and even smell. Given your project's focus on food and memory, this is a critically important dimension for us.  Would you like to see the **[DM-1] table** for the Sensory Dimension?  Here are the key sensory questions for your experience:   1. **Soundscape & Music:** Beyond the diegetic sounds of cooking and city life, should we use a non-diegetic musical score? For example, a subtle, melancholic piano track in London versus traditional Chinese instrumental music in Quanzhou to guide the user's emotions? 2. **Haptics & Touch:** How tangible should the world feel? Should we use simple controller vibrations when picking up objects, or invest in more advanced haptics to simulate the specific texture of chopping a vegetable or the comforting warmth of a bowl of soup? 3. **Scent & Memory:** Given the focus on food, this is a unique opportunity. Should we design for a **contextual scent**component? Imagine pairing the visuals with the actual smell of rain on London pavement or the aroma of five-spice in the Quanzhou market. Is this a feasible and desirable direction? 4. **Sensory Dominance:** During the flashback to grandma's kitchen (Scene 3), which sense should dominate to simulate a powerful memory? Should the visuals become hazy while the **sounds** (a specific song, a chopping rhythm) and perhaps **smells** become hyper-realistic? | Let's move to the **Sensory Dimension (DM-1)**, where we'll layer in sound, scent, and touch to make the memories of London and Quanzhou feel vivid and emotionally resonant.  For a story so deeply connected to taste and memory, this dimension is paramount. First, would you like to see the **DM-1 Sensory Table**?  Here are the key sensory dials to consider for your narrative:   1. **SEN1: Diegetic Sound vs. Non-Diegetic Sound:** How should we use audio to guide emotion? Should the environment's sounds (street vendors, London rain) tell the story, or should a musical score or narrator's voiceover carry the emotional weight?    - Example: The clatter of a London kitchen could fade into the sizzle of a Quanzhou oyster omelette in a memory transition, using purely diegetic sound to bridge time and space. 2. **SEN2: Contextual Scent vs. Scentless Environment:** Scent is a powerful memory trigger. Should we incorporate congruent scents—like the greasy smell of a London chip shop or the aromatic spices of a Quanzhou market—to enhance realism and emotional punch?    - [IF] Rationale: Using scent directly serves the value of teaching about 'home' by engaging the olfactory system, which is deeply tied to memory and a sense of place. 3. **SEN4: Rich Haptic Feedback vs. Simple/No Haptic Feedback:** How tangible should the food preparation feel? Should the user feel the texture of a lychee, the weight of a wok, and the vibration of chopping? Or should haptics be minimal to avoid complexity?    - Consideration: Rich haptics during cooking scenes would make the act of preparing cultural food a deeply embodied and memorable ritual. 4. **SEN6: Damage Simulation vs. No Damage Feedback:** This experience is likely low-risk, but should we use any high-intensity feedback for emotional jolts? For example, a sudden, strong haptic pulse paired with the visual of a dropped family heirloom plate shattering?   **Initial Synthesis for DM-1 Sensory:**  To serve the core value of identity through personal narrative, I propose this modulation:   - **[DL] Sound:** Primarily [MOD] Diegetic Sound, using the ambient sounds of each city and the specific sounds of food preparation (sizzling, chopping) to ground the user. We'll use [MOD] Non-Diegetic Sound sparingly, perhaps for a subtle musical motif during transitions. - **[DL] Scent:** [MOD] Contextual Scent for key memory triggers—the oily scent of the London takeaway, the distinct aroma of Quanzhou street food—to create powerful, involuntary memory recall. - **[DL] Haptic Feedback:** [MOD] Rich Haptic Feedback for all interactions with food items and kitchen tools, making these actions feel weighty, cultural, and significant. - **[DL] Damage Simulation:** [MOD] No Damage Feedback. The narrative is introspective, not based on physical risk. We'll avoid user discomfort.   The anticipated **[EFF] Effects** are a deeply immersive and emotionally charged experience where the senses of smell, sound, and touch become direct conduits to the protagonist's memories and feelings of cultural displacement and belonging.  Do you want to change or tweak any of these sensory dials, modulations, or effects?  Shall we proceed to **DM-2 Placeness** to define the atmosphere and meaning of these locations? |

## Appendix: Placeness Dimension DM-2

| **ChatGPT** | **Gemini** | **DeepSeek** |
| --- | --- | --- |
| **DM-2 Placeness** — how we craft the *felt atmosphere* of London and Quanzhou so “home” is legible in space, not just plot.  **4–5 Targeted Questions**   1. **Place anchors:** Which 2–3 *micro-places* per city? (e.g., London: Ridley Road stall, Chinatown late-night, Brick Lane bagel; Quanzhou: Kaiyuan Temple alley, West Street snack lane, harbour embankment). 2. **Material & light:** Contemporary grit vs. polished? London sodium/fluoro at night; Quanzhou dawn humidity + stone patina? 3. **Typography & language layer:** Shopfront fonts, bilingual signage (English/Chinese/Minnan), hand-written menus—how prominent? 4. **Ritual objects:** What symbolic cues say *home*? (thermos mug, enamel bowl, incense cup, travel Oyster card, door shoes, family photo magnet). 5. **Stylization dial:** Photoreal baselines with memory overlays, or consistently stylized (ink-wash edges, film-grain warmth)?   **My Default Proposal (edit freely)**   - **[DL] Micro-places → [MOD] London: Chinatown back-alley, Ridley Road veg stall, Brick Lane bakery; Quanzhou: West Street shacha stall, Kaiyuan side alley, harbour wall** → **[EFF]** Specificity = authenticity. **[IF]** Concrete places scaffold identity recall. - **[DL] Light/Weather → [MOD] London: damp neon + bus brake steam; Quanzhou: warm dawn haze, low sea breeze** → **[EFF]** Atmospheric contrast frames journey. **[IF]** Users read mood changes instantly. - **[DL] Texture/Materials → [MOD] Tile grout, greasy steel, cardboard crates ↔ coral-stone, wood lattice, red-yeast stains** → **[EFF]** Tactile truth. **[IF]** Material memory binds food ↔ place. - **[DL] Language Layer → [MOD] Bilingual signage; Minnan chalk menus; captions toggle; VO points to signs**→ **[EFF]** Legible multiculturalism. **[IF]** Teaches hybridity without exposition. - **[DL] Symbolic kit → [MOD] Personal artifacts migrate scene-to-scene (Oyster card → incense cup; enamel bowl persists)** → **[EFF]** Throughline of self. **[IF]** Objects become portable “home.” - **[DL] Stylization → [MOD] Photoreal base; memory edges with soft ink-wash bloom during overlays** → **[EFF]** Time-layering cue. **[IF]** Reduces ambiguity, maintains comfort.   Want the compact **[DM-2] table**? Change or tweak any dials/mods/effects? Proceed to **DM-3 Temporal**? | Understood. As before, I'll propose a starter configuration for the Sensory dimension to maintain a coherent design, and then we will proceed directly to Placeness.  Here is the proposed synthesis for **DM-1 Sensory**:   - **[DL] Diegetic vs. Non-Diegetic Sound** → **[MOD]** A blend. We will rely heavily on diegetic sounds (sizzling food, city ambiance) to ground the user. A subtle, non-diegetic musical score will shift between locations: a melancholic piano in London, and sparse, traditional strings in Quanzhou.   - **[EFF]** This creates high realism while using music as a powerful emotional signifier to contrast the two identities.   - **[IF]** The soundscape carries a heavy narrative load, guiding the user's emotional state and defining the feeling of each "home" without words. - **[DL] Rich vs. Simple Haptic Feedback** → **[MOD]** We will use simple, contextual controller vibrations to confirm interactions like picking up an object or the rhythmic tap of chopping vegetables.   - **[EFF]** This provides essential physical feedback, reinforcing embodiment without requiring complex hardware and keeping the experience widely accessible.   - **[IF]** This grounds the user's actions in the virtual world, preventing them from feeling disconnected, which is crucial for the cooking scenes. - **[DL] (Implicit Dial - Sensory Dominance)** → **[MOD]** In the pivotal flashback scene (Scene 3), audio will become dominant. The visuals will blur slightly, while the specific sounds of grandma's kitchen become hyper-realistic and spatialized.   - **[EFF]** This powerfully mimics the nature of memory, where sounds and feelings often persist more clearly than sharp visuals.   - **[IF]** Shifting the sensory focus from visual to auditory forces the user to engage more deeply with the emotional core of the memory.   **DM-2: Placeness Dimension**  Now we arrive at Placeness. This is where we transform a "space" into a "place." It's about embedding meaning, history, and emotion into the environment to evoke a true sense of belonging or alienation. This is the very heart of your project's theme.  Would you like me to generate the **[DM-2] table** for Placeness?  Let's dial in the feeling of "home":   1. **Ambience & Atmosphere:** How do we define the emotional tone of each location? For the London flat, should we use cool, blueish lighting and the sound of rain to create a feeling of cozy solitude? For Quanzhou, should we use warm, golden light and the distant sounds of a community to evoke nostalgia and belonging? 2. **Symbolism & Meaning:** What key objects will tell the story of the character's identity in each place? In the London flat, perhaps it's a framed university degree and a worn-out transit pass. In Quanzhou, maybe it's an old family photo or a traditional tea set on display. 3. **Authenticity vs. Stylization:** Should both London and Quanzhou be rendered with photorealistic **authenticity** to ground the story in the real world? Or could the Quanzhou scenes be slightly **stylized** and dreamlike, representing an idealized memory of home rather than the physical reality? 4. **Activities & Lived-in Feel:** How do we make these places feel alive beyond the user's presence? In London, do we see shadows of neighbors in other windows? In Quanzhou, do we see other people (AI agents) performing daily **rituals** or routines, like sweeping a stoop, to make the city feel like a living community? | Let's explore **DM-2 Placeness**, the dimension that transforms a virtual space into a meaningful place, evoking a sense of "insideness," belonging, and emotional resonance.  For a story about "home," this dimension is the heart of the experience. First, would you like to see the **DM-2 Placeness Table**?  Here are the key dials to define the atmosphere and meaning of London and Quanzhou:   1. **PLA1: Fidelity of Physical Setting vs. Distortion:** Should London and Quanzhou be photorealistic, or should we use a stylized, perhaps memory-like aesthetic? Realism can ground the experience, while stylization can focus on emotional truth.    - Example: London could have a gritty, high-fidelity realism, while Quanzhou memories might be slightly softened or color-saturated to feel like an idealized recollection. 2. **PLA2: Inviting Ambience vs. Alienating Atmosphere:** What is the primary emotional tone of each place? Is London alienating and overwhelming, or is it a place of proud independence? Is Quanzhou warmly inviting, or is it strangely unfamiliar upon return?    - [IF] Rationale: Modulating ambience directly serves the value of teaching complex identity by making the user feel the protagonist's shifting relationship with each city. 3. **PLA3: Authenticity vs. Artificiality:** How do we handle the cultural specifics? Should the ancestral temple be a meticulously researched, authentic reconstruction, or a more universal, symbolic representation of "home"?    - Consideration: High authenticity in Quanzhou, especially the temple and food, will create deep cultural resonance for those who know it and lend credibility for those who don't. 4. **PLA4: Symbolism vs. Ambiguity:** What symbols can we embed to reinforce the theme? A worn passport, a fading family photo, a specific tree in the temple courtyard? Or should we leave these elements more ambiguous for the user to project onto?    - Example: The same type of bowl appearing in both the London flat and the Quanzhou kitchen could be a powerful symbol of carrying "home" within oneself.   **Initial Synthesis for DM-2 Placeness:**  To powerfully contrast the two notions of "home," I propose:   - **[DL] Fidelity:** [MOD] High Fidelity for both cities, but with a key difference: London's fidelity is "gritty" and detailed in its urban chaos, while Quanzhou's is "warm" and rich in cultural textures (wood, stone, fabric). - **[DL] Ambience:** [MOD] Alienating Atmosphere for London's public spaces (hustle/bustle) contrasted with [MOD] Inviting Ambience for the Quanzhou street and temple. The London flat is a nuanced mix—a sanctuary that also feels transient. - **[DL] Authenticity:** [MOD] High Authenticity, especially for Quanzhou's cultural markers (temple architecture, street food stalls). This builds credibility and allows the environment itself to teach the user about the cultural definition of "home." - **[DL] Symbolism:** [MOD] Explicit Symbolism. We will deliberately place symbolic objects—the recurring bowl, the passport, the letter—to create a visual narrative that ties the scenes together and reinforces the theme of a dual identity.   The anticipated **[EFF] Effects** are a clear emotional journey from feeling like an outsider in a realistic London to feeling a deep, culturally-grounded sense of belonging in an authentic Quanzhou, ultimately leading to a profound understanding of the narrative's core theme.  Do you want to change or tweak any of these placeness dials, modulations, or effects?  Shall we proceed to **DM-3 Temporal** to design the flow of time, memory, and narrative? |

## Appendix: Temporal Dimension DM-3

| **ChatGPT** | **Gemini** | **DeepSeek** |
| --- | --- | --- |
| **DM-3 Temporal** — we’ll shape time: pacing, structure, and how memory-time overlays clock-time.  **5 Targeted Questions**   1. **Macro structure:** Strictly linear journey, or light **branching detours** (optional memories/food stalls) that always rejoin the spine? 2. **Time modulation:** Where to use **compression** (montage of “hustle years”), **expansion** (slow Quanzhou return), or **freeze/loop** (ritual moments in grandma’s kitchen)? 3. **Overlay logic:** Do London↔Quanzhou **overlaps** appear on sensory triggers (steam, VO phrase), on user actions (placing a dish), or both? 4. **Session length & beats:** Target total runtime (e.g., 20–30 min) and per-scene minutes; any hard maximum per scene? 5. **Failure/flow:** Any **retries** or is it **fail-forward** (missed interactions auto-resolve with VO so the story keeps moving)?   **My Default Proposal (edit freely)**   - **[DL] Structure → [MOD] Linear spine + optional micro-branches** → **[EFF]** Agency without plot sprawl. **[IF]** Keeps focus on identity arc; easy to finish in one sitting. - **[DL] Time scaling → [MOD] Compress hustle (1 decade → 90s montage); expand Quanzhou return (5–7 min slow cinema); freeze grandma ritual (10–15s loop while wrapping zongzi)** → **[EFF]** Contrast toil vs. arrival vs. sacred memory. **[IF]** Teaches value via rhythm, reduces fatigue. - **[DL] Triggers → [MOD] Dual: sensory cue + action-gated overlays** → **[EFF]** User causes time-shift, world supports it. **[IF]** Embeds learning in interaction, not exposition. - **[DL] Runtime → [MOD] 25 min total; per scene ≈ 4–6–5–5–5 min** → **[EFF]** Meaty but accessible. **[IF]** Museums/classrooms friendly; predictable pacing. - **[DL] Flow policy → [MOD] Fail-forward with gentle catch-ups** → **[EFF]** No stalls; narrative integrity. **[IF]** Empathy > skill gating.   **Example Beat Map (condensed)**   1. **Arrivals** (4m): real-time. 2. **Edible Map** (6m): optional detours (≤90s each), forced rejoin at “steam portal.” 3. **Hustle Years** (5m): kinetic montage with user-timed “punch-in” beats. 4. **Fracture & Superposition** (5m): overlays on VO + dish placement. 5. **Quanzhou Return** (5m): long takes, minimal prompts, heartbeat slows.   Change or tweak any dials/mods/effects? Want the **[DM-3] table**? Proceed to **DM-4 Cultural**? | Based on your project's goal to explore the meaning of 'home', here is a proposed synthesis for **DM-2 Placeness**:   - **[DL] Inviting Ambience vs. Alienating Atmosphere** → **[MOD]** We will create a sharp contrast. London will have a cool, solitary ambience (blue light, rain sounds) to feel like a 'cozy shelter'. Quanzhou will have a warm, communal ambience (golden light, distant community sounds) to feel like 'belonging'.   - **[EFF]** This creates a clear emotional language for each location, defining one as a constructed refuge and the other as an intrinsic home.   - **[IF]** The contrasting atmospheres will subconsciously guide the user's feelings about each place, reinforcing the narrative theme of searching for identity. - **[DL] Symbolism vs. Ambiguity** → **[MOD]** We will use strong, explicit **symbolism**. The London flat will feature objects of achievement and assimilation (a degree, a transit pass). The Quanzhou home will feature objects of heritage and connection (a family altar, a tea set).   - **[EFF]** These objects act as narrative shortcuts, telling a deep story about the character's life and values in each world without words.   - **[IF]** This provides a strong representation of the character's bifurcated identity, allowing the user to piece together their history through environmental storytelling. - **[DL] Authenticity vs. Artificiality** → **[MOD]** London will be rendered with gritty **authenticity**. The Quanzhou scenes, especially the flashbacks, will be slightly **stylized** and dreamlike.   - **[EFF]** Authenticity grounds the London experience in reality, while stylization makes Quanzhou feel like a romanticized, idealized memory.   - **[IF]** This choice visually represents the core internal conflict: the tension between a real, imperfect present and a perfect, perhaps misremembered, past.   **DM-3: Temporal Dimension ⏳**  This dimension is about how we control the flow of time to shape the narrative. We'll manage pacing, the 20-year time jump, and the transitions between present reality and past memory.  Would you like to see the **[DM-3] table** for the Temporal Dimension?  Let's design the rhythm of your story:   1. **Pacing & Time Jumps:** Your story spans two decades. How do we represent this passage of time in Scene 2 (London Life)? Should it be a quick montage of seasons changing outside the flat window, or a series of interactive vignettes showing key moments over the years? 2. **Linearity & Flashbacks:** The memory of grandma's kitchen is a key flashback. Should this be a hard, sudden cut that jolts the user from the present to the past? Or a slow, dreamlike dissolve where the London kitchen fades away and the Quanzhou kitchen materializes around them? 3. **Time Dilation:** During the emotional peak of the flashback, should we use **expanded time** (slow-motion)? For example, slowing down the moment the user tastes a familiar dish to emphasize its emotional impact and allow for reflection. 4. **Transitions:** For the journey from London to Quanzhou (Scene 4), should the transition be **seamless** (e.g., a continuous train ride where the exterior view morphs from British to Chinese landscapes)? Or should it be **abrupt**and fragmented, using a series of quick cuts to represent the disorientation of a long-haul flight? | Let's proceed to the **DM-3 Temporal Dimension**, where we design the flow of time, memory, and narrative sequence to shape the user's journey and perception.  For a story spanning two decades and hinging on memory, controlling time is essential. First, would you like to see the **DM-3 Temporal Table**?  Here are the key temporal dials for your narrative:   1. **TEM1: Compressed Time vs. Expanded Time:** The two-decade span cannot be real-time. How should we compress time? Should we use montages or symbolic changes in the environment? Conversely, which moments deserve expansion—like the slow, deliberate act of preparing a family recipe?    - [IF] Rationale: Expanding time during cooking rituals serves the value of teaching about identity by emphasizing the cultural weight and personal history in everyday actions. 2. **TEM2: Linearity vs. Non-Linearity:** Should the story be told strictly chronologically, or should we use flashbacks and memory fragments? The memory of grandma's kitchen triggered by London food is inherently non-linear.    - Example: The narrative could be linear from London to Quanzhou, but with non-linear, interactive flashbacks triggered by objects in the flat. 3. **TEM3: Seamless Transitions vs. Abrupt Transitions:** How do we move between scenes, and between present and past? A seamless, visual morph from a London onion to a Quanzhou scallion could be beautiful. An abrupt cut might jar the user, useful for emphasizing the shock of the letter.    - Consideration: Seamless transitions can beautifully illustrate how memories are cued by sensory experiences, strengthening the theme. 4. **TEM5: Varied Pacing vs. Monotonic Pacing:** How do we rhythmically structure the scenes? The hustle of London should feel fast and overwhelming, the flat should be slower and reflective, and the temple should be almost timeless.   **Initial Synthesis for DM-3 Temporal:**  To create a narrative that feels like a flowing stream of consciousness and memory, I propose:   - **[DL] Time Scale:** Use [MOD] Compressed Time for the overarching narrative (20 years pass) and [MOD] Expanded Time for key emotional and ritualistic moments (reading the letter, cooking a dish, entering the temple). - **[DL] Linearity:** A [MOD] Non-Linear structure where the core journey is linear (London -> Quanzhou), but within it, memories are accessed non-linearly through interactive objects, creating a user-driven exploration of identity. - **[DL] Transitions:** [MOD] Seamless Transitions for memory sequences (e.g., the London kitchen blending into grandma's kitchen) to show the fluidity of memory, and [MOD] Abrupt Transitions for major life changes (e.g., the decision to return) to create narrative impact. - **[DL] Pacing:** A deliberately [MOD] Varied Pacing, moving from high-paced (London streets) to medium-paced (the flat) to slow, contemplative pacing (Quanzhou temple) to mirror the emotional arc from chaos to peace.   The anticipated **[EFF] Effects** are a deeply engaging and emotionally resonant journey where the user doesn't just watch time pass, but feels its passage—the slow accretion of memory, the sudden jolt of change, and the timelessness of returning home.  Do you want to change or tweak any of these temporal dials, modulations, or effects?  Shall we proceed to **DM-4 Cultural** to define the specific cultural markers and norms that will ground this experience? |

## Appendix: Cultural Dimension DM-4

| **ChatGPT** | **Gemini** | **DeepSeek** |
| --- | --- | --- |
| **DM-4 Cultural** — ensure the narrative honors lived experience, rituals, and diaspora nuance without flattening identities.  **5 Targeted Questions**   1. **Linguistic mix:** Proportion of English / Mandarin / Minnan (Hokkien)? Subtitles always on, opt-out, or opt-in? 2. **Ritual & symbolism:** Which *specific* practices/objects are canonical to include (e.g., incense offering, door-threshold shoes, red yeast rice for festivals), and which to avoid or treat obliquely? 3. **Narrative ethics:** Is this a composite story, autobiographical, or community-sourced? Any red lines (e.g., immigration procedures, sensitive family events) that must be anonymized or abstracted? 4. **Community consultation:** Which cultural advisors or local vendors/temples will you consult for accuracy and permission (e.g., Quanzhou stall owner, Kaiyuan Temple liaison, London Chinatown association)? 5. **Localization & access:** Target regions and dialect packages? Caption styles (bilingual stacked, color-coded by speaker), and accessibility (screen-reader for captions, glossary pop-ups)?   **Default Proposal (edit freely)**   - **[DL] Language policy → [MOD] English primary VO; Minnan & Mandarin fragments for intimacy; captions on by default with language tags** → **[EFF]** Authentic texture + inclusivity. **[IF]** Teaches hybridity while remaining accessible. - **[DL] Ritual portrayal → [MOD] Show, don’t explain; consented filming of incense/offerings; no gamification of sacred acts** → **[EFF]** Respect first, curiosity second. **[IF]** Avoids instrumentalizing culture. - **[DL] Story ethics → [MOD] Composite protagonist; sensitive details anonymized; consent forms for any real names/likenesses** → **[EFF]** Truthful without exposure. **[IF]** Protects subjects; preserves credibility. - **[DL] Community credit → [MOD] Name vendors/locations with permission; in-experience credits board with QR to community orgs** → **[EFF]** Reciprocity over extraction. **[IF]** Returns value to sources. - **[DL] Localization → [MOD] Caption presets (EN↔ZH-Simplified↔ZH-Traditional); color-coded speakers; glossary tooltips for “shacha, hong zao, orh nee”** → **[EFF]** Learning moments without friction. **[IF]** Supports education goals. - **[DL] Representation guardrails → [MOD] Avoid monolith tropes; show intra-diaspora diversity (Fujianese vs. broader “Chinese London”)** → **[EFF]** Nuanced identity. **[IF]** Aligns with teaching “home” as plural.   Change or tweak any dials/mods/effects? Want the **[DM-4] table**? Proceed to **DM-5 Social**? | **DM-4: Cultural Dimension**  This dimension breathes life into our places by embedding specific human contexts—social norms, language, aesthetics, and rituals. It's how we ensure London feels like a multicultural metropolis and Quanzhou feels like a specific, ancestral home.  Would you like to see the **[DM-4] table** for the Cultural Dimension?  Let's infuse your worlds with culture:   1. **Cultural Specificity:** How deeply should we embed the specific culture of Quanzhou? Should we include details only a native might recognize (e.g., specific Minnan dialect phrases, local folklore) for maximum authenticity, or keep the references more broadly Chinese for wider accessibility? 2. **Social Norms:** How should the background characters behave? In London, should people be polite but distant, respecting personal space? In Quanzhou, should the AI characters be more communal, greeting the user or interacting with each other in public spaces to create the feeling of a tight-knit community? 3. **Cultural Narrative:** Should the story of each place be told **explicitly** (e.g., a voiceover explaining the history of a landmark) or **implicitly** through the environment, allowing the user to absorb the cultural context through observation? 4. **Simulating Adaptation:** The protagonist adapts to a new culture in London. Should we reflect this by using UI helpers or audio cues early on to explain unfamiliar cultural details (like navigating the Tube), which then fade away as the character becomes accustomed to their new life? | Let's move to the **DM-4 Cultural Dimension**, where we embed the specific symbols, aesthetics, and social narratives that will make the experiences of London and Quanzhou feel authentic and resonant.  This dimension is vital for grounding the abstract concepts of "home" and "identity" in tangible cultural reality. First, would you like to see the **DM-4 Cultural Table**?  Here are the key cultural dials for your narrative:   1. **CUL1: Culturally Specific vs. Culturally Neutral:** How deeply should we embed specific cultural details? Should the London scene reflect a specific borough and the Quanzhou scene a specific district, or should they feel like generic "anycities"?    - [IF] Rationale: High cultural specificity serves the value of teaching about identity by showing that 'home' is not a vague concept, but is built from a million precise, tangible details—a specific brand of tea, a particular temple carving, a local slang term. 2. **CUL2: Cultural Familiarity vs. Cultural Novelty:** For whom are we designing? Should the experience assume prior knowledge of Chinese culture, or should it explain and introduce elements to an unfamiliar audience? This shapes the learning curve.    - Example: The ritual in the ancestral temple can feel familiar and deeply moving to a Chinese user, but novel and educational to a foreign user, if designed with care. 3. **CUL3: Embedded Social Norms vs. Open Social Norms:** Should the VR environment enforce cultural rules? For example, should the user be subtly guided to remove their (virtual) shoes before entering the home in Quanzhou, or to observe a moment of silence in the temple?    - Consideration: Embedding these norms doesn't restrict agency; it teaches through embodied practice, making the cultural learning direct and experiential. 4. **CUL4: Explicit Cultural Narrative vs. Implicit Cultural Narrative:** How is the cultural context delivered? Through direct narration or labels (explicit), or purely through environmental storytelling and object interaction (implicit)?    - Example: The user could find a labeled photo of a Mazu statue (explicit), or simply see it in the temple and infer its significance from the context of reverence (implicit).   **Initial Synthesis for DM-4 Cultural:**  To create a credible, respectful, and deeply informative experience, I propose:   - **[DL] Specificity:** [MOD] Highly Culturally Specific. We will anchor London in a recognizable district like Newham or Hackney, and Quanzhou in its historic quarter, using accurate architecture, signage, and ambient dialogue. - **[DL] Familiarity/Novelty:** A balanced [MOD] that presents Quanzhou's culture with inherent authenticity, trusting the user to meet it where they are. For the unfamiliar, it will feel novel and educational; for the familiar, it will feel like a true homecoming. - **[DL] Social Norms:** [MOD] Embedded Social Norms for key rituals. The experience will gently guide the user to observe etiquette in the temple (e.g., bowing, making an offering) and perhaps in the home (e.g., handling tea with both hands). This turns cultural knowledge into embodied understanding. - **[DL] Cultural Narrative:** A hybrid approach. Primarily [MOD] Implicit Cultural Narrative, letting the environment and objects speak for themselves, but with optional [MOD] Explicit cues (e.g., a translatable label on a historical object) to ensure accessibility and learning for all users.   The anticipated **[EFF] Effects** are a rich, authentic cultural immersion that avoids stereotyping. The user will not just learn about the culture but will have followed its rituals, making the final understanding of "home" feel earned and personally significant.  Do you want to change or tweak any of these cultural dials, modulations, or effects?  Shall we proceed to **DM-5 Social** to define the presence and nature of other characters in this journey? |

## Appendix: Social Dimension DM-5

| **ChatGPT** | **Gemini** | **DeepSeek** |
| --- | --- | --- |
| **DM-5 Social** — who is present (real people, AI agents), how they behave, and what social signals shape identity and empathy.  **5 Targeted Questions**   1. **Mode:** Solo first, or add **co-present** visitors (classmates, museum-goers) for shared reflection? Synchronous (live) vs. asynchronous (ghost replays/notes)? 2. **Avatars (you):** Invisible hands, abstracted silhouette, or **diegetic proxy** (lightly stylized migrant avatar)? First- vs. third-person moments? 3. **Agents (others):** Which AI characters are essential (grandma in kitchen memory, London vendor, Quanzhou stall owner, immigration officer)? Small talk vs. branching dialogue? 4. **Voice/Chat:** Live voice chat on/off? Emote wheel, point-and-gaze, or short **scripted call-and-response** for language snippets (Minnan phrases)? 5. **Social safety & privacy:** Mute/block, personal bubble, PG-13 filter; opt-out of recording; cultural etiquette prompts?   **Default Proposal (edit as needed)**   - **[DL] Mode → [MOD] Solo canonical; optional 2–4 user co-op “reflection mode” post-credits; asynchronous memory-notes (sticky lanterns with text/audio)** → **[EFF]** Core empathy protected; learning amplified in groups. **[IF]** Education goal benefits from discussion after narrative. - **[DL] Self-avatar → [MOD] First-person hands + soft outline; brief third-person tableaus during key memories** → **[EFF]** Identification without uncanny valley. **[IF]** Supports Proteus effect while maintaining comfort. - **[DL] NPC density → [MOD] Sparse but meaningful: 1–2 per micro-place (vendor, fellow migrant, elder)** → **[EFF]** Focused social cues, low noise. **[IF]** Keeps cognitive load appropriate. - **[DL] AI dialogue → [MOD] Short, intent-driven branches; code-switching; respectful refusals** → **[EFF]**Agency with narrative guardrails. **[IF]** Prevents derailing while modeling intercultural talk. - **[DL] Social tools → [MOD] Point, nod, emote wheel, “teach-me” phrase button for Minnan; live voice only in reflection mode** → **[EFF]** Inclusive participation. **[IF]** Lowers linguistic anxiety; supports learning. - **[DL] Safety → [MOD] Personal bubble, session privacy, profanity filter, skip-any-scene option** → **[EFF]**Psychological safety. **[IF]** Essential for empathy-focused content.   Want the concise **[DM-5] table**? Change or tweak any dials/mods/effects? Proceed to **DM-6 Cognitive**? | Here is the proposed synthesis for **DM-4 Cultural**, which will define the human texture of your two worlds.   - **[DL] Culturally Specific vs. Culturally Neutral** → **[MOD]** We'll be highly **culturally specific**. Quanzhou will feature Minnan dialect in the ambient audio and accurate local architecture. London will be specific in its multicultural fabric.   - **[EFF]** This deep authenticity makes the feeling of "homecoming" in Quanzhou more powerful and resonant, contrasting with the more impersonal, diverse environment of London.   - **[IF]** Specific cultural cues provide a strong representation of belonging and nostalgia, directly reinforcing the narrative's core emotional journey. - **[DL] Embedded vs. Open Social Norms** → **[MOD]** We'll embed distinct **social norms**. London's background characters will be polite but distant. Quanzhou's AI characters will be more communal and interactive with each other.   - **[EFF]** This clearly contrasts the individualistic atmosphere of a Western metropolis with the collectivist feeling of the protagonist's hometown.   - **[IF]** The behavior of AI agents serves as environmental storytelling, reinforcing the user's emotional state of being an individual in London versus part of a community in Quanzhou. - **[DL] Explicit vs. Implicit Cultural Narrative** → **[MOD]** The cultural story will be told **implicitly** through environmental details, symbolic objects, and background activity.   - **[EFF]** This encourages user discovery and interpretation, creating a more immersive "show, don't tell" experience that respects the user's intelligence.   - **[IF]** By asking the user to piece the story together, we engage their cognitive faculties, leading to a deeper and more personal understanding of the protagonist's journey.   **DM-5: Social Dimension**  This dimension governs social presence and interaction. Since this is a single-player narrative, our focus is on the user's representation and the believability of the computer-controlled characters (AI agents) that make the world feel populated and alive.  Would you like to see the **[DM-5] table** for the Social Dimension?  Let's design the social fabric of your experience:   1. **Avatar & Identity:** We previously decided on a 'hands only' representation. Reconsidering this from a social angle, does that still feel right? Or would a **stylized, non-realistic avatar** help the user embody the *character* of the migrant, creating a clearer separation between player and protagonist? 2. **AI Agent Complexity:** How believable should the background characters be? In Quanzhou, for example, should they be **simple, scripted agents** on repeating loops? Or more **complex agents** who can react to the user's presence with a simple nod or gaze, making the city feel more dynamic and aware? 3. **Scripted Social Interaction:** Should the user have a direct, albeit scripted, social interaction? For example, in the final scene, could a key part of the emotional climax be buying a street food item from a friendly vendor, forcing a simple but meaningful exchange? 4. **The Proteus Effect:** An avatar's appearance can alter our behavior. Could we use this subtly? For instance, if the user glimpses their reflection in London, could their appearance look progressively more 'Westernized' over the 20 years, visually reinforcing the theme of shifting identity? | Let's proceed to the **DM-5 Social Dimension**, which governs how users are represented and how they interact with other characters in this journey of identity.  This dimension is crucial for bringing the protagonist's world to life through relationships. First, would you like to see the **DM-5 Social Table**?  Here are the key social dials for your narrative:   1. **SC1: Realistic Avatars vs. Stylized Avatars:** How should the characters (the grandmother, London colleagues, Quanzhou relatives) appear? Hyper-realistic avatars can deepen empathy but risk the "uncanny valley." Stylized designs can be more expressive and focus on emotional essence.    - [IF] Rationale: Stylized avatars can serve the value of teaching about identity by stripping away photorealistic details to emphasize universal emotional connections and memory-like impressions. 2. **SC2: Human-Controlled Avatars vs. Complex Agents:** Will other users join this experience, or will all characters be AI-driven agents? For a personal narrative, AI agents are likely best. How complex should they be? Should they have full conversational AI, or be scripted to deliver specific, poignant lines?    - Consideration: Using [MOD] Complex Agents for key characters (like the grandmother) allows for meaningful, scripted interactions that drive the narrative forward without the unpredictability of multi-user spaces. 3. **SC3: Emergent Social Norms vs. Prescribed Social Norms:** Should the user be free to interact with characters in any way, or should the experience guide them toward culturally specific interactions, like a bow or a specific greeting?    - Example: The experience could prescribe a bow to an elder in the temple, turning social etiquette into a learned, embodied part of the "return." 4. **SC4: Simulated Social Context vs. Abstract Social Context:** Should the social interactions feel like authentic, nuanced conversations, or should they be more symbolic and dream-like, reflecting the nature of memory?    - This links to the Proteus Effect: A more realistic social context could make the user feel more responsible for their interactions, while an abstract one might focus them on the broader emotional themes.   **Initial Synthesis for DM-5 Social:**  To maintain the introspective, personal tone of the story while creating meaningful social touchpoints, I propose:   - **[DL] Avatar Realism:** [MOD] Stylized Avatars for all characters. This avoids the uncanny valley and aligns with the slightly abstract, memory-driven quality of the experience. It allows the user to project universal feelings onto the characters. - **[DL] Agent Type:** [MOD] Complex Agents (AI) for the key narrative roles (Grandmother, Market Vendor, Temple Elder). They will be scripted with specific, emotionally resonant dialogue and gestures to create believable, poignant moments without requiring other human users. - **[DL] Social Norms:** [MOD] Prescribed Social Norms for key cultural interactions (e.g., bowing, offering tea). This directly serves the educational value by teaching cultural etiquette through embodied practice. - **[DL] Social Context:** [MOD] Simulated Social Context for the Quanzhou scenes to create authenticity, but with a [MOD] more Abstract Social Context for the London scenes (e.g., crowd sounds without distinct conversations) to emphasize the protagonist's feeling of isolation there.   The anticipated **[EFF] Effects** are a social landscape that feels authentic where it matters most—in the connections of "home"—while using abstraction to underscore the alienation of the migrant experience. The user will form a clear, emotional bond with key characters that reinforces the narrative of belonging.  Do you want to change or tweak any of these social dials, modulations, or effects?  Shall we proceed to **DM-6 Cognitive** to design the learning and mental engagement aspects? |

## Appendix: Cognitive Dimension DM-6

| **ChatGPT** | **Gemini** | **DeepSeek** |
| --- | --- | --- |
| **DM-6 Cognitive** — set guidance, complexity, and memory supports so users learn “home/identity” without overload.  **5 Targeted Questions**   1. **Guidance style:** How much **guided discovery vs. instruction** (e.g., 70/30, 50/50)? 2. **Info density:** Max concurrent cues per beat (objects, captions, VO)? Cap at 3? 3. **Wayfinding:** Diegetic signposting (sound beacons, light, NPC gestures) vs. UI HUD? 4. **Memory aids:** Wrist journal, glossary tooltips, collectible artifacts (recipes/objects) that persist across scenes? 5. **Formative reflection:** Micro-prompts (1–2 lines), interactive choices, or short spoken reflections saved to a “lantern wall”?   **Default Proposal (edit freely)**   - **[DL] Guidance mix → [MOD] 70% guided discovery / 30% explicit instruction** → **[EFF]** Agency with clarity. **[IF]** Empathy grows via doing; key ideas still land. - **[DL] Cognitive load → [MOD] Cap 3 concurrent elements (1 interaction, 1 VO idea, 1 visual cue)** → **[EFF]**Lower overwhelm. **[IF]** Keeps attention on meaning, not UI. - **[DL] Wayfinding → [MOD] Diegetic beacons (sizzle pans, vendor call, steam glow) + subtle floor arrows only if idle >8s** → **[EFF]** Intuitive flow. **[IF]** Preserves immersion; prevents stalls. - **[DL] Scaffolds → [MOD] “Edible Timeline Tray” (3 slots: London dish, Grandma memory, Quanzhou dish); wrist journal with glossary (shacha, hong zao, orh nee)** → **[EFF]** Chunking + semantic links. **[IF]** Encodes “home as network.” - **[DL] Reflection → [MOD] Three micro-prompts (≤20 words) + optional audio note to lantern wall** → **[EFF]**Consolidation without fatigue. **[IF]** Supports education goals, enables group debrief. - **[DL] Adaptivity → [MOD] Quiet “kitchen spirit” coach appears only after 10s inactivity; offers 1 hint, then fades** → **[EFF]** Safety net, minimal intrusion. **[IF]** Maintains flow state. - **[DL] Accessibility → [MOD] Caption presets, VO replay button, interaction slow-mode toggle** → **[EFF]**Inclusive pacing. **[IF]** Reduces cognitive barriers.   **Synthesis (proposed):** Guided discovery with strict cue capping; diegetic wayfinding; a persistent tray/journal for chunking; brief reflections that feed a lantern wall; adaptive, minimal coaching; accessibility toggles.  Want the concise **[DM-6] table**? Change or tweak any dials/mods/effects? Proceed to **DM-7 Psychological**? | I'll outline a proposed social dynamic for the experience, then we'll proceed to the Cognitive dimension.  Here is the synthesis for **DM-5 Social**:   - **[DL] Realistic vs. Stylized Avatars** → **[MOD]** We will primarily use a disembodied 'hands only' view. However, we'll use reflections as a narrative tool: reflections in London are indistinct, but a final, clear reflection in Quanzhou reveals a stylized representation of the protagonist.   - **[EFF]** This maintains universal accessibility while using the act of 'seeing oneself' as a powerful, climactic reward symbolizing the reunification of identity.   - **[IF]** This choice focuses the user's empathy on their actions and perspective, making the final moment of self-recognition a narrative payoff. - **[DL] Simple vs. Complex Agents** → **[MOD]** The world will be populated by moderately **complex AI agents** who react to the user’s presence with simple gestures (a glance, a nod) and interact with each other.   - **[EFF]** This makes the world feel alive and responsive without the high cost of advanced AI, striking a balance between immersion and feasibility.   - **[IF]** The believable behavior of background characters is crucial for establishing the contrasting social atmospheres of London and Quanzhou. - **[DL] (Implicit - Social Interaction)** → **[MOD]** We will include one key, **scripted social interaction**: the user buying street food in Quanzhou. The interaction is simple, but the vendor responds with warmth in the local dialect.   - **[EFF]** This single moment of positive, direct social contact serves as a powerful catalyst for the final emotional release.   - **[IF]** After being a passive observer, this interaction provides a narrative payoff, symbolizing the protagonist's welcome and reconnection with their community.   **DM-6: Cognitive Dimension**  This dimension is about managing the user's mental workload. For a narrative-driven piece, our goal is to keep the cognitive load low so the user can focus on the story and emotions, rather than on solving puzzles or figuring out complex controls. We want to create a state of "flow." 🧠  Would you like to see the **[DM-6] table** for the Cognitive Dimension?  Let's design how the user will process this story:   1. **Cognitive Load:** Should the experience be very gentle and **low-load**, with clear visual and audio cues guiding the user from one step to the next? Or should there be moments of **higher-load** discovery, like figuring out a recipe without explicit instructions? 2. **Learning Style:** How does the user learn the story? Through **experiential learning** (piecing the narrative together from environmental clues)? Or with support from **explicit instruction** (e.g., a brief, internal monologue from the protagonist guiding their attention)? 3. **Agency & Pacing:** Should the pacing be **user-directed**, allowing them to explore each scene for as long as they wish? Or **system-directed**, where the narrative gently moves forward after key moments to maintain a carefully controlled emotional arc? 4. **Attention:** Do we want to encourage **ambient awareness**, where the user can simply exist in a space and absorb the atmosphere? Or should we focus on **directed attention**, using subtle highlights or sounds to guide them toward the next important interactive object? | Let's proceed to the **DM-6 Cognitive Dimension**, where we design how the user processes information, learns, and engages mentally with the themes of home and identity.  This dimension is critical for ensuring the user comprehends the complex narrative without feeling overwhelmed or bored. First, would you like to see the **DM-6 Cognitive Table**?  Here are the key cognitive dials for your experience:   1. **COG1: Cognitive Overload vs. Cognitive Underload:** How much information should we present at once? The London street scene could be overwhelming by design, but we must ensure the user can still process the key narrative elements.    - [IF] Rationale: Managing load directly serves the value of teaching by ensuring the user has the mental capacity to reflect on the complex themes rather than just reacting to stimuli. 2. **COG2: Directed Attention vs. Ambient Awareness:** Should we guide the user's focus with clear tasks (find an ingredient, read the letter), or let them absorb the story through free exploration of the environment?    - Example: In the flat, we could direct attention to a specific photo on the wall to trigger a memory, using it as a narrative anchor point. 3. **COG3: Experiential Learning vs. Explicit Instruction:** How is the cultural knowledge transferred? Should the user discover the meaning of a ritual by doing it (experiential), or should a narrator explain it first (explicit)?    - Consideration: The core of your experience is about personal discovery, which strongly aligns with [MOD] Experiential Learning. 4. **COG5: User-Directed Agency vs. System-Directed Agency:** How much control does the user have over the narrative pace? Can they linger in the kitchen as long as they want, or does the story progress after a set time?    - This is key for reflection: Allowing the user to control the pace in reflective moments (the temple) gives them time to internalize the themes.   **Initial Synthesis for DM-6 Cognitive:**  To facilitate deep understanding and personal reflection, I propose:   - **[DL] Cognitive Load:** A deliberately [MOD] Varied Load. We will create moments of high sensory load (London streets) to convey overwhelm, but carefully scaffold them with moments of low load (the flat, the temple) for consolidation and reflection, preventing fatigue. - **[DL] Attention:** A balance of [MOD] Directed Attention for critical path narrative beats (the letter, the temple offering) and [MOD] Ambient Awareness for environmental storytelling and emotional atmosphere, allowing the user to choose their depth of exploration. - **[DL] Learning Model:** Primarily [MOD] Experiential Learning (Kolb's Cycle). The user will concretely experience cooking, will reflect on the triggered memories, will abstract the concept of "home," and can actively test this new understanding in the final scene. - **[DL] Agency:** [MOD] User-Directed Agency in reflective scenes (the flat, the temple) to empower personal introspection, but [MOD] System-Directed Agency for major transitions (e.g., the journey to Quanzhou) to maintain narrative cohesion.   The anticipated **[EFF] Effects** are a mentally engaging journey that respects the user's capacity for thought. They will move from being slightly overwhelmed (mirroring the migrant experience) to having a clear, self-directed space for reflection, leading to a strong and personal comprehension of the narrative's core themes.  Do you want to change or tweak any of these cognitive dials, modulations, or effects?  Shall we proceed to the final dimension, **DM-7 Psychological**, to define the core emotional journey and motivational drivers? |

## Appendix: Psychological Dimension DM-7

| **ChatGPT** | **Gemini** | **DeepSeek** |
| --- | --- | --- |
| **DM-7 Psychological** — tune core emotions, agency, tension, and safety so the lesson about “home” lands and feels held.  **5 Targeted Questions**   1. **Core emotions mix:** What’s primary/secondary? (e.g., **longing → resilience → bittersweet relief**). 2. **Agency framing:** Do users *author a definition of home* (select artifacts/phrases) or mainly *witness* with small choices? 3. **Tension budget:** Where to place peak stress (bureaucracy, family health call, identity microaggression)? How intense (soft / medium / sharp)? 4. **Comfort & grounding:** Preferred tools—breath cue, gaze anchor, “hold to pause,” content warnings/skip-anytime? 5. **Ending tone:** Quiet closure, proud recommitment, or open ambiguity? Any post-experience **re-integration ritual**(lantern wall, recipe card takeaway)?   **Proposed Modulations (edit freely)**   - **[DL] Emotion arc → [MOD] Longing → hustle-pride → fracture-anxiety → tender reconnection → bittersweet relief** → **[EFF]** Cohesive catharsis. **[IF]** Aligns empathy+education via contrast then release. - **[DL] Agency → [MOD] Meaning-making choices (assemble edible timeline; choose a doorstep to knock; record a 10s “home is…” line)** → **[EFF]** Ownership of insight. **[IF]** Encodes learning in self-authored act. - **[DL] Tension → [MOD] One medium-intensity spike (visa/health call), 60–90s; haptic heartbeat + narrowed audio bed** → **[EFF]** Salient but safe. **[IF]** Highlights stakes without overwhelm. - **[DL] Safety → [MOD] Content note upfront; skip-any-scene; “press + hold to steady” (breath pacer + horizon line); seated mode; panic-quit** → **[EFF]** Psychological safety net. **[IF]** Essential for inclusive empathy design. - **[DL] Identity reflection → [MOD] Post-credits lantern wall shows your chosen artifacts + recorded line (local-only by default)** → **[EFF]** Integration & recall. **[IF]** Reinforces takeaway, supports group debrief. - **[DL] Closure → [MOD] Quiet closure with proud undertone (door opens to sea breeze; VO: “home is a network I carry”)** → **[EFF]** Memorable, teachable end. **[IF]** Serves goal: complexity of home, not a single place.   **Synthesis (proposed):** A held journey that peaks once, returns to calm; users enact a personal definition of home; robust safety/grounding; ending provides calm closure plus a tangible reflection artifact.  Want the concise **[DM-7] table**? Change or tweak any dials/modulations/effects? If you’re happy with DM-0…DM-7, **explicitly confirm** and I’ll deliver **DM-8 Final Synthesis**. | To keep the focus on the emotional narrative, here is the proposed synthesis for **DM-6 Cognitive**:   - **[DL] Cognitive Overload vs. Cognitive Underload** → **[MOD]** We will maintain a **low cognitive load**. Interactions will be intuitive and goals will be clear and narratively driven, never feeling like puzzles.   - **[EFF]** This prevents frustration and ensures the user's mental energy is dedicated to absorbing the story and empathizing with the character.   - **[IF]** By minimizing extraneous mental tasks, we create a direct channel to the user's emotional faculties, which is the primary purpose of the experience. - **[DL] Experiential Learning vs. Explicit Instruction** → **[MOD]** The design will primarily use **experiential learning** (storytelling through the environment), supported by minimal **explicit instruction** via the protagonist's brief internal monologue at key moments.   - **[EFF]** This creates an immersive balance where the user feels clever for discovering the story, but the monologue ensures they don't miss crucial emotional beats.   - **[IF]** The environment provides the context, while the inner voice provides the emotional anchor, creating a powerful and balanced information flow. - **[DL] User-Directed vs. System-Directed Agency** → **[MOD]** The overall narrative will be **system-directed** to ensure perfect pacing, but within each scene, the user will have pockets of **user-directed** freedom to explore and interact.   - **[EFF]** This "string of pearls" structure gives the user a strong sense of presence and freedom while ensuring the emotional arc is delivered with maximum impact.   - **[IF]** This approach balances the user's need for agency with the narrative's need for control, creating a satisfying and emotionally resonant experience.   **DM-7: Psychological Dimension**  This is our final dimension and the culmination of all our work. Here, we focus on intentionally crafting the user's emotional journey. We'll use narrative, pacing, and agency to guide the user from a state of displacement to a feeling of profound homecoming. ❤️‍🩹  Would you like to see the **[DM-7] table** for the Psychological Dimension?  Let's define the core emotional arc:   1. **Emotional Valence:** What is the specific emotional journey? Should the London scenes evoke a complex mix of pride and **negative valence** feelings like loneliness? Should the Quanzhou scenes be designed for purely **positive valence** emotions like joy, nostalgia, and belonging? 2. **Agency & Role:** Should the user feel like an **active protagonist**, where their action of cooking the meal directly *causes* the memory and the subsequent journey? Or should they feel more like a **passive observer**, witnessing a story that is happening *to* them? 3. **Motivation:** What drives the user forward? Is it purely **intrinsic motivation**—a curiosity to understand the character's life? Or should we add simple **extrinsic goals** (e.g., a visual cue to touch a key object) to gently guide them? 4. **Tension & Release:** To make the homecoming feel more powerful, should we intentionally build psychological **tension** in the "Catalyst" scene? A moment of unease or dissonance as the character realizes their London life feels incomplete, which is then resolved in the final, comforting scene in Quanzhou?   Once we have dialed in these psychological elements, we will have completed all eight dimensions. Please let me know your thoughts, and then confirm if you are ready to proceed to the **DM-8 Final Synthesis**. | Let's conclude our dimensional design with **DM-7 Psychological**, where we define the core emotional journey and what will motivate the user through this experience of identity and homecoming.  This dimension brings everything together to create a transformative emotional arc. First, would you like to see the **DM-7 Psychological Table**?  Here are the key psychological dials to shape the user's emotional journey:   1. **PSY1: Positive Valence vs. Negative Valence:** What is the dominant emotional tone? Should we create a journey from negative (alienation in London) to positive (belonging in Quanzhou), or maintain a more complex, bittersweet balance throughout?    - [IF] Rationale: A clear emotional arc serves the value of teaching about 'home' by making the user feel the transformation the protagonist undergoes, creating embodied understanding beyond intellectual concept. 2. **PSY2: Active Protagonist vs. Passive Observer:** Should the user make choices that affect the narrative (like which memories to explore or how to perform rituals), or are they witnessing a predetermined story?    - Consideration: Giving the user agency in key moments—like choosing which ingredient to cook with or how to arrange the temple offering—can deepen their personal connection to the themes. 3. **PSY3: Intrinsic Motivation vs. Extrinsic Motivation:** What drives the user forward? Natural curiosity about the story (intrinsic) or external rewards like unlocking scenes (extrinsic)? For a narrative about personal identity, intrinsic motivation is more powerful.    - Example: The motivation to see the grandmother's memory fully realized should come from the emotional connection, not from a "memory collected" notification. 4. **PSY4: Predictable Events vs. Unpredictable Events:** How much surprise should we incorporate? The letter/call scene should feel unexpected, but the overall arc of return should feel inevitable. Where do we place emotional surprises?    - This affects memory encoding: An unpredictable sensory moment—like the sudden, accurate scent of a Quanzhou street food—can create a stronger, more vivid memory.   **Initial Synthesis for DM-7 Psychological:**  To create a powerful, transformative emotional journey, I propose:   - **[DL] Emotional Valence:** A deliberate [MOD] arc from Negative Valence (loneliness, routine, displacement in London) to Positive Valence (connection, meaning, belonging in Quanzhou), with nuanced bittersweet moments acknowledging what was left behind. - **[DL] Agency:** The user as an [MOD] Active Protagonist in key ritual moments (cooking, temple offering) where their choices refine the emotional texture, but within an overall authored narrative path that ensures the core story is told. - **[DL] Motivation:** Primarily [MOD] Intrinsic Motivation, driven by the natural human curiosity about identity and the emotional pull of the grandmother character and the concept of "return." - **[DL] Predictability:** [MOD] Mostly Predictable narrative structure (the return is coming) punctuated by [MOD] Unpredictable sensory and emotional moments (the vividness of a triggered memory, the specific content of the letter) to maintain engagement and strengthen memory encoding.   The anticipated **[EFF] Effects** are a deeply moving experience where the user doesn't just understand the concept of divided identity but feels the emotional weight of it, culminating in a cathartic sense of resolution that makes the theme of "home" personally meaningful.  Do you want to change or tweak any of these psychological dials, modulations, or effects?  **Checkpoint:** We have completed all eight dimensions (DM-0 through DM-7). Shall I proceed to the **DM-8 Final Synthesis** to deliver the complete, consolidated VR experience design? |

# Appendix: Final Synthesis

| **ChatGPT** | **Gemini** | **DeepSeek** |
| --- | --- | --- |
| 1) Experience Goals Statement Teach the complex, plural nature of **home** and **identity** through an embodied migrant narrative spanning London to Quanzhou, optimizing for **education + empathy** with high accessibility and cultural care. 2) Core Concept A five-scene VR journey where **food** is the bridge: you assemble an **Edible Timeline** (London dish → Grandma memory → Quanzhou dish), traverse micro-places through **steam portals**, and author a brief “**home is…**” reflection that persists on a lantern wall. | 1. Experience Goals Statement To create a deeply empathetic and educational VR narrative that allows users to experience a migrant's 20-year journey. The primary goal is to explore the complex, personal, and fluid nature of 'home' and 'identity' by contrasting the constructed life in a new country with the profound emotional pull of an ancestral homeland. 2. Core Concept "Two Kitchens" is a first-person narrative experience following a migrant who builds a life in the multicultural hustle of London, only to find their sense of self reawakened by a single, powerful food memory. The user viscerally experiences the character's journey of adaptation, reflection, and eventual return to the ancient city of Quanzhou, discovering that 'home' is ultimately a feeling, not just a place. | 1. Experience Goals Statement The primary goal of this VR experience is to teach the complex nature of 'home' and 'identity' through the personal narrative of a migrant who spends two decades in London before returning to their ancestral city of Quanzhou. It aims to evoke empathy and understanding by immersing the user in the sensory, cultural, and emotional journey of the protagonist, using food and memory as central motifs. 2. Core Concept "Homecoming" is a linear narrative with non-linear memory access, where the user moves through five key scenes. The experience uses embodied interactions with food and culturally prescribed rituals to create a deep sense of place and personal transformation. The core concept is to use VR's unique ability to blend sensory immersion (weak representation) with narrative reflection (strong representation) to explore the duality of identity. |

## Appendix: Project Timelines

| **ChatGPT** | **Gemini** | **DeepSeek** |
| --- | --- | --- |
| - Hardware/Software Foundation (2–3 wks): Target PCVR + Quest; Unity/Unreal setup; spatial audio pipeline; perf budgets; scent optional. - Scene Design (2–3 wks): Blockouts; beats; interaction maps; accessibility notes per scene. - 3D Modeling (4–6 wks): Food/props hero assets (photogrammetry where possible); micro-place kits (London/Quanzhou/kitchen). - Interaction (3–4 wks): Grab/place, “cook” verbs (chop/ladle/wrap), teleport + guided drift, tray/journal systems. - Coding (4–6 wks): Narrative state machine; overlay triggers; captions; adaptive coach; reflection capture. - Integration (2–3 wks): Audio VO passes (EN/Minnan/Mandarin), spatial beds, haptics; localization; scent hooks. - Developer Testing (2–3 wks): Comfort checks; cue capping; fail-forward polish; metrics/logging; content permissions. | - Hardware/Software Foundation & Prototyping 2 Weeks - Scene Design & Whiteboxing 3 Weeks - 3D Modeling & Asset Creation 6 Weeks - Interaction Coding & Mechanics 4 Weeks - Sound Design & Music Composition 3 Weeks - Integration & Scene Building 4 Weeks - Developer Testing & Polishing 3 Weeks - Total Estimated Time ~25 Weeks | - Phase 1: Hardware/Software Foundation (2 months): Establish VR platform (PC VR for high fidelity), select game engine (Unity/Unreal), set up VR interaction toolkit, and procure haptic and scent devices for prototyping. - Phase 2: Scene Design (1 month): Finalize scene layouts, transitions, and narrative flow based on the five scenes. - Phase 3: 3D Modeling & Asset Creation (3 months): Create high-fidelity, culturally authentic 3D environments and assets for London and Quanzhou, focusing on key symbolic objects and food items. - Phase 4: Interaction Design (2 months): Implement hand-tracking for food interactions, haptic feedback for object manipulation, and AI agent behaviors for social interactions. - Phase 5: Coding & Integration (3 months): Develop the non-linear memory triggering system, seamless transitions, and integrate sensory devices (haptics, scent). - Phase 6: Developer Testing (1 month): Internal testing for comfort, narrative clarity, and sensory experience refinement. |

## Appendix: Dimension Value Alignment Table

### Appendix: ChatGPT Dimension Value Alignment Table

| **Dimension** | **Core Design Choice** | **Serves Value By** | **[IF]** |
| --- | --- | --- | --- |
| Spatial | Teleport + guided drift; selective 1:3–1:6 scale shifts | Embodied agency with cinematic clarity | Comfort ensures focus on meaning; scale marks memory significance |
| Sensory | Diegetic market audio + intimate VO; photoreal food; warm memory bloom; optional scent | Grounded authenticity, emotional texture | Multisensory ties food↔place↔self |
| Placeness | Concrete micro-places; bilingual signage; migrating artifacts | Specificity prevents stereotype, aids recall | Objects act as portable “home” cues |
| Temporal | Linear spine + optional detours; compress hustle; expand return | Rhythm teaches contrast of labor vs arrival | Overlays bind time layers during actions |
| Cultural | Show-don’t-explain rituals; consented credits; glossary tooltips | Respect + learning without extraction | Cultural accuracy builds trust and empathy |
| Social | Solo canonical; optional reflection mode; sparse, meaningful NPCs | Protects immersion; enables discussion | Dialogue branches model intercultural talk |
| Cognitive | 70/30 discovery/instruction; cap 3 concurrent cues; tray/journal scaffolds | Keeps load low, learning high | Chunking encodes “home as network” |
| Psychological | Longing→pride→anxiety→tender→relief; skip-any-scene; grounding tools | Safe catharsis and ownership | Safety nets sustain empathy without overwhelm |

### Appendix: Gemini Dimension Value Alignment Table

| **Dimension** | **Core Design Choice** | **Serves Value By** | **[IF]** |
| --- | --- | --- | --- |
| **Spatial** | Hybrid Locomotion | Maximizing immersion in emotional scenes while ensuring comfort, keeping the user focused on the story. | Focuses cognitive energy on narrative by simplifying movement in large spaces. |
| **Sensory** | Audio-Dominant Memory | Simulating the non-visual nature of powerful memories, creating a deeper empathetic link to the past. | Shifts from visual-heavy [wkR] to audio-driven [strR] to deepen emotional engagement. |
| **Placeness** | Symbolic Environments | Telling the story of a bifurcated identity through the specific objects and atmospheres of each 'home'. | Conveys a rich, non-verbal narrative about the character's internal state. |
| **Temporal** | Pacing Contrast | Emphasizing the emotional weight of a single moment of memory versus two decades of routine life. | Manipulates time to direct user focus and maximize the impact of the core memory. |
| **Cultural** | High Specificity | Creating an authentic sense of belonging and nostalgia, making the final homecoming feel meaningful. | Provides strong, authentic cues that trigger feelings of connection and resolution. |
| **Social** | Scripted Interaction Payoff | Using a single moment of social acceptance to provide a powerful, cathartic release for the user. | Moves the user from passive observer to active participant, delivering a narrative reward. |
| **Cognitive** | Low Cognitive Load | Removing frustration and allowing the user to dedicate all their mental energy to empathy and story. | Prevents mental distraction, creating a direct channel to the user's emotional faculties. |
| **Psychological** | Tension & Release Arc | Crafting a deliberate emotional journey from loneliness to belonging, fulfilling the narrative's purpose. | Structures the entire experience to build emotional dissonance and then resolve it. |

### Appendix: DeepSeek Dimension Value Alignment Table

| **Dimension** | **Core Design Choice** | **Serves Value By** |
| --- | --- | --- |
| Spatial | Hybrid locomotion (teleportation for large spaces, room-scale for intimate moments) and embodied interaction with food | Creating an intuitive and tangible connection to the rituals of cooking and memory, making the theme of identity physically interactive. |
| Sensory | Diegetic sound, contextual scents, and rich haptics for food interactions | Engaging multiple senses to trigger powerful memories and emotional responses, directly linking sensory experience to the concept of home. |
| Placeness | High-fidelity, culturally specific environments with explicit symbolism | Grounding the abstract concepts of home and identity in authentic, recognizable places that evoke a sense of belonging or alienation. |
| Temporal | Non-linear memory access within a linear journey, with expanded time for rituals | Allowing the user to explore the protagonist's past in a way that mirrors how memory works, deepening the personal connection to the narrative. |
| Cultural | Embedded social norms and high cultural specificity in Quanzhou scenes | Teaching cultural identity through embodied practice and authentic detail, making the return to Quanzhou a culturally rich learning experience. |
| Social | Stylized avatars and complex AI agents for key characters | Focusing on emotional essence and cultural etiquette without the uncanny valley, facilitating empathy and connection with the protagonist's relationships. |
| Cognitive | Varied cognitive load and experiential learning through rituals | Managing mental engagement to avoid overload while facilitating deep, personal discovery of the themes through direct experience. |
| Psychological | An emotional arc from negative valence (London) to positive valence (Quanzhou) with intrinsic motivation | Guiding the user through an emotional transformation that mirrors the protagonist's journey, making the concept of home felt on a visceral level. |

## VR Experience Design Document (VRED) Table

### Appendix: ChatGPT’s VR Experience Design Document (VRED) Table

| **Section** | **Concise Entry** |
| --- | --- |
| Objectives | Teach plural “home/identity”; foster empathy; enable reflective takeaway |
| Audience | Museum/theatre-goers; students (13+); diaspora communities; general public |
| Platforms | PCVR + Quest; seated/standing; optional scent diffuser |
| Mechanics | Teleport + drift; grab/place; chop/ladle/wrap; steam portal transitions; tray/journal |
| Content | 5 scenes: Arrivals; **Edible Map**; Hustle Montage; Fracture & Superposition; Quanzhou Return |
| Accessibility | Captions on; slow-mode; snap-turn 45°; vignette; seated mode; VO replay |
| Safety/Comfort | Content notes; skip-any-scene; breath pacer; horizon line; panic-quit |
| Metrics | Scene completion; dwell per stall; cue violations; reflection rate; glossary opens; comfort toggles |
| **Section** | **Concise Entry** |
| Objectives | Teach plural “home/identity”; foster empathy; enable reflective takeaway |

### Appendix: Gemini’s VR Experience Design Document (VRED) Table

| **Category** | **Description** |
| --- | --- |
| **VR Title** | *Two Kitchens* |
| **Target Audience** | Adults (25+) interested in narrative VR, empathy experiences, migrant stories, and cultural exploration. |
| **Platform** | Standalone VR (e.g., Meta Quest 3, Apple Vision Pro) to maximize accessibility and allow for room-scale movement. |
| **Core Mechanics** | Direct Object Interaction (grabbing, chopping, placing); Hybrid Locomotion (room-scale, teleport); Gaze-based and Proximity-based Narrative Triggers. |
| **Narrative** | A 5-scene linear narrative about a migrant's 20-year journey, using food and memory to explore themes of home and identity. |
| **Accessibility** | Seated and Standing modes; optional subtitles for all dialogue and voiceover; simple, intuitive controls with no complex button combinations. |
| **Safety/Comfort** | Use of teleportation and gentle, seamless transitions to minimize potential for cybersickness. Emotionally intense themes are handled with care. |
| **Metrics** | Primary metrics are qualitative: user feedback on emotional impact and thematic resonance. Secondary metric is the experience completion rate. |

### Appendix: DeepSeek’s VR Experience Design Document (VRED) Table

| **Category** | **Description** |
| --- | --- |
| **VR Title** | Homecoming: A Taste of Return |
| **Target Audience** | Adults interested in cultural narratives, empathy experiences, and diaspora stories; educational institutions. |
| **Platform** | PC VR (e.g., Valve Index, Meta Quest Pro) requiring haptic gloves and optional scent device. |
| **Core Mechanics** | Hand-tracked object manipulation, teleportation & room-scale locomotion, memory triggering via object gaze/hold, prescribed cultural gestures. |
| **Narrative** | A linear 5-scene structure with non-linear, interactive memory flashbacks triggered by sensory objects. |
| **Characters** | Stylized AI agents: Grandmother (memory), London Colleague, Quanzhou Market Vendor, Temple Elder. |
| **Environment** | 5 Scenes: 1. London Hustle & Takeaway, 2. London Flat & Memory, 3. The Decision (Transition), 4. Quanzhou Return, 5. Ancestral Temple. |
| **Accessibility** | Options for reduced scent/haptics, alternative locomotion (joystick), subtitles for dialogue, and color-blind mode. |
| **Safety/Comfort** | No damage simulation; teleportation to reduce cybersickness; content warning for themes of displacement. |
| **Metrics** | User emotional response (post-experience survey), completion rate of cultural rituals, time spent in reflective scenes. |

## Appendix: Dimension Modulation and Effects Table

### Appendix: ChatGPT’s Dimension Modulation and Effects Table

| **Dimension** | **Dimension Modulation** | **Effects Spectrum** |
| --- | --- | --- |
| Spatial | Teleport + slow drift; parallax steam portals; 1:1 base with episodic enlargement | Agency ↔ comfort; poetic transitions without sickness |
| Sensory | Spatial audio contrast; haptic verbs; photoreal food + warm bloom memories; optional scent | Presence ↑; memory salience ↑; overload ↓ |
| Placeness | Gritty London neon vs. Quanzhou dawn haze; material truth (steel/coral-stone); bilingual layer | Legible atmosphere; identity cues embedded |
| Temporal | Compression (montage), expansion (return), ritual freeze loops; action-gated overlays | Narrative clarity; emotional pacing; teachable beats |
| Cultural | Language mix (EN/Minnan/Mandarin, captions on); ritual ethics; community credits | Inclusion + authenticity; avoids tokenism |
| Social | First-person hands + soft outline; NPC density 1–2 per place; reflection co-op | Empathy focus; low social noise; optional communal meaning-making |
| Cognitive | Cue cap = 3; diegetic wayfinding; edible tray + journal glossary | Reduced cognitive load; better transfer |
| Psychological | Single medium-intensity spike; breath/gaze anchors; “home is…” authorship | Salient stakes, safe containment, owned insight |

### Appendix: Gemini’s Dimension Modulation and Effects Table

| **Dimension** | **Dimension Modulation (The "How")** | **Effects Spectrum (The Result)** |
| --- | --- | --- |
| **Spatial** | Hybrid locomotion (room-scale in kitchens, teleport in cities); Direct physics-based interaction with key objects; Disembodied 'hands only' presence. | **High immersion in intimate spaces & high comfort in large spaces.** A strong sense of object tangibility, combined with a universally accessible and non-prescriptive user identity. |
| **Sensory** | Heavily diegetic sound with a subtle, location-specific musical score; Simple, contextual haptic feedback; Audio becomes dominant in flashbacks. | **A highly atmospheric and grounded reality.** Music guides emotion, haptics confirm action, and the audio-driven memory feels powerful and dreamlike. |
| **Placeness** | Contrasting ambiances (cool/solitary London vs. warm/communal Quanzhou); Strong symbolic objects; Stylized, dreamlike Quanzhou flashbacks. | **A clear, non-verbal emotional language for each location.** The environments tell a story of a real, imperfect present versus a romanticized, perfect past. |
| **Temporal** | Linear narrative with a single non-linear flashback; Time compression for the 20-year span and time expansion for the key memory; Seamless, abstract travel transition. | **A clear, powerful, and emotionally focused narrative.** The user feels the weight of time passing, the impact of a single moment, and has time for reflection during travel. |
| **Cultural** | High cultural specificity in Quanzhou (Minnan dialect, landmarks); Contrasting social norms (distant vs. communal AI); Implicit, environmental storytelling. | **A deep sense of authenticity and place.** The user feels the cultural shift from individualism to community, discovering the story organically. |
| **Social** | Moderately complex, reactive AI agents; A single, key scripted social interaction; Use of reflections as a narrative device for identity. | **A world that feels alive and responsive.** The final social interaction provides a powerful cathartic moment of acceptance and reconnection. |
| **Cognitive** | Low cognitive load with intuitive controls; Experiential learning supported by minimal internal monologue; System-directed pacing with pockets of freedom. | **An effortless, frustration-free "flow" state.** The user is absorbed in the narrative, guided but not constrained, ensuring maximum emotional focus. |
| **Psychological** | An emotional arc from loneliness/dissonance to belonging/joy; The user as an active protagonist whose actions trigger the story; Building tension that leads to a cathartic release. | **A potent and memorable emotional journey.** The user feels responsible for the narrative's progression and experiences a powerful resolution. |

### Appendix: DeepSeek’s Dimension Modulation and Effects Table

| **Dimension Modulation (The "How")** | **Effects Spectrum (The Result)** |
| --- | --- |
| **Spatial:** Teleportation for scale, room-scale for intimacy, hand-tracking for objects. | Efficient navigation with deep immersion in key moments; high tangibility of cultural artifacts. |
| **Sensory:** Authentic diegetic soundscapes; targeted scent release; detailed haptic vibrations. | Strong, involuntary memory recall; heightened realism and emotional punch; embodied cultural practices. |
| **Placeness:** Gritty London vs. Warm Quanzhou fidelity; explicit symbolic objects. | Clear emotional contrast; a visual narrative of identity woven through the environments. |
| **Temporal:** Object-triggered flashbacks; seamless blends between present and past. | A personal, exploratory feeling of rediscovering one's own history; fluid, dream-like narrative. |
| **Cultural:** Prescribed rituals (bowing, offering); authentic architecture and language. | Embodied cultural learning; a deep sense of credibility and respect for the subject matter. |
| **Social:** Stylized, expressive characters; scripted, poignant AI interactions. | Strong emotional bonds with key characters; reduced uncanny valley; focus on narrative and emotion. |
| **Cognitive:** High-load public scenes, low-load private reflection; learning-by-doing. | A balanced mental journey that mirrors the narrative arc, preventing fatigue while promoting insight. |
| **Psychological:** Journey from alienation to belonging; user agency in key rituals. | A cathartic emotional transformation; a personal sense of responsibility and connection to the outcome. |

## Appendix: Story Mapping Table

### Appendix: ChatGPT’s Story Mapping Table

| **Epic (Scene)** | **User Story** | **Acceptance Criteria** |
| --- | --- | --- |
| Arrivals | As a user, I navigate first thresholds (airport → bedsit) to feel dislocation/aspiration | Complete in ≤4 min; at least 2 interactions; no sickness events; captions legible |
| Edible Map | As a user, I compose an **Edible Timeline** linking London dish, grandma memory, Quanzhou dish | Place 3 items on tray; hear 3 VO snippets; at least 1 overlay triggered by action |
| Hustle Years | As a user, I experience compressed labor montage and small wins | 90s montage playable; 3 punch-in beats; no fail states; haptic feedback present |
| Fracture & Superposition | As a user, I witness London↔Quanzhou overlays during a life stressor | One 60–90s tension spike; breath cue appears; user can continue regardless of choices |
| Quanzhou Return | As a user, I slow down, choose a door, and author “home is…” reflection | 5–7 min pacing; choice logged; 10s audio/text saved to lantern wall; opt-out respected |
| Post-credits Reflection | As a user, I review my artifacts and optionally co-reflect | Lantern wall shows tray artifacts + quote; local-only by default; share toggle explicit |

### Appendix: Gemini’s Story Mapping Table

| **Epic (Scene)** | **User Story** | **Acceptance Criteria** |
| --- | --- | --- |
| **Scene 1: London Arrival** | As the user, I want to experience the sensory overload of arriving in London to feel the character's initial displacement. | - User is in a crowded, noisy Tube station. - Audio is loud and overlapping. - User can look around but cannot move freely. - Scene fades to black after 60 seconds. |
| **Scene 2: A London Kitchen** | As the user, I want to prepare a meal in a London kitchen to understand the character's adapted life. | - User can pick up and interact with specific ingredients. - The kitchen environment contains symbolic objects (e.g., degree, wok). - The passage of 20 years is shown via a montage outside the window. |
| **Scene 3: The Catalyst** | As the user, I want to taste the meal and trigger a memory to experience the emotional turning point. | - Eating the meal triggers a slow dissolve transition. - The London kitchen fades and is replaced by the Quanzhou kitchen. - Audio shifts to be dominant, with clear, memory-specific sounds. |
| **Scene 4: The Transition** | As the user, I want to experience the journey back to Quanzhou to have a moment of reflection. | - User is in an abstract, dreamlike train car. - The view outside the window seamlessly morphs from UK to Chinese landscapes. - A subtle, pensive musical score plays. |
| **Scene 5: Quanzhou** | As the user, I want to buy and taste street food in Quanzhou to feel the final emotional release of homecoming. | - User can navigate a small, atmospheric Quanzhou street. - A scripted interaction with a food vendor is triggered. - Tasting the food triggers the final voiceover and a fade to credits. |
| **Scene 1: London Arrival** | As the user, I want to experience the sensory overload of arriving in London to feel the character's initial displacement. | - User is in a crowded, noisy Tube station. - Audio is loud and overlapping. - User can look around but cannot move freely. - Scene fades to black after 60 seconds. |

### Appendix: DeepSeek’s Story Mapping Table

| **User Story** | **Acceptance Criteria** |
| --- | --- |
| As a user, I want to explore the London street and flat so that I can feel the protagonist's daily life and triggers for memory. | - User can teleport around the London street and flat.  - Interacting with specific objects (e.g., a photo, a ingredient) triggers a memory flashback.  - The transition between London street and flat is seamless. |
| As a user, I want to prepare a dish in the London flat so that I can trigger a vivid memory of my grandmother's kitchen. | - User can pick up ingredients and utensils with hand-tracking.  - Haptic feedback is provided when handling objects.  - After completing the dish, the environment morphs into the grandmother's kitchen. |
| As a user, I want to receive the letter/call from Quanzhou so that I can understand the catalyst for the return journey. | - The letter/call scene is triggered after the memory flashback.  - The audio of the call is clear and emotionally resonant.  - The user is guided to the next scene (Quanzhou) after the call. |
| As a user, I want to arrive in Quanzhou and explore the street market so that I can experience the sensory overload of return. | - The Quanzhou street scene loads with vibrant colors and sounds.  - Contextual scents (e.g., oyster omelette) are released.  - The user can interact with market stalls and hear vendors. |
| As a user, I want to perform a ritual in the ancestral temple so that I can feel a sense of closure and belonging. | - The temple environment is serene and sacred.  - The user is guided to make an offering (e.g., placing fruit) and bow.  - The experience ends with a reflective voice-over. |

## Appendix: Final Statement

| **ChatGPT** | **Gemini** | **DeepSeek** |
| --- | --- | --- |
| This design anchors empathy and education in embodied, low-friction interactions where **food is pedagogy**. Temporal contrast, cultural specificity, and careful safety nets deliver a cathartic but contained arc. Trade-offs are explicit: we favor comfort and clarity over maximal agency, and photoreal food over fully stylized worlds to preserve authenticity. The result teaches that **home is plural, portable, and enacted**, not a single pin on a map. | This design balances all eight dimensions to create a focused and powerful narrative experience. By deliberately choosing a low-agency, system-directed structure (**Cognitive**, **Temporal**), we sacrifice gameplay freedom to gain precise control over the emotional arc (**Psychological**). The technical dimensions (**Spatial**, **Sensory**) are modulated not for maximum realism, but for maximum thematic impact, such as using an audio-dominant flashback. The more abstract dimensions (**Placeness**, **Cultural**, **Social**) provide the rich, non-verbal context that tells the deep story of a search for identity. The result is a coherent, value-driven design aimed at delivering a single, potent message: home is a feeling you carry within you. | This synthesis represents a purposeful orchestration of the eight dimensions to deliver a value-driven experience about identity. The core trade-off balances authorial narrative guidance with user agency in key rituals, ensuring the story is told while the meaning is personally built. The choice of high sensory fidelity risks technical complexity but is essential for achieving the deep emotional resonance and memory-driven narrative that makes the abstract concept of "home" a tangible, felt experience. Every dimension is aligned to guide the user through a transformative journey from sensory overload and alienation to sensory comfort and belonging. |

# Appendix: Visualisation

## Appendix: ChatGPT’s Visualisation


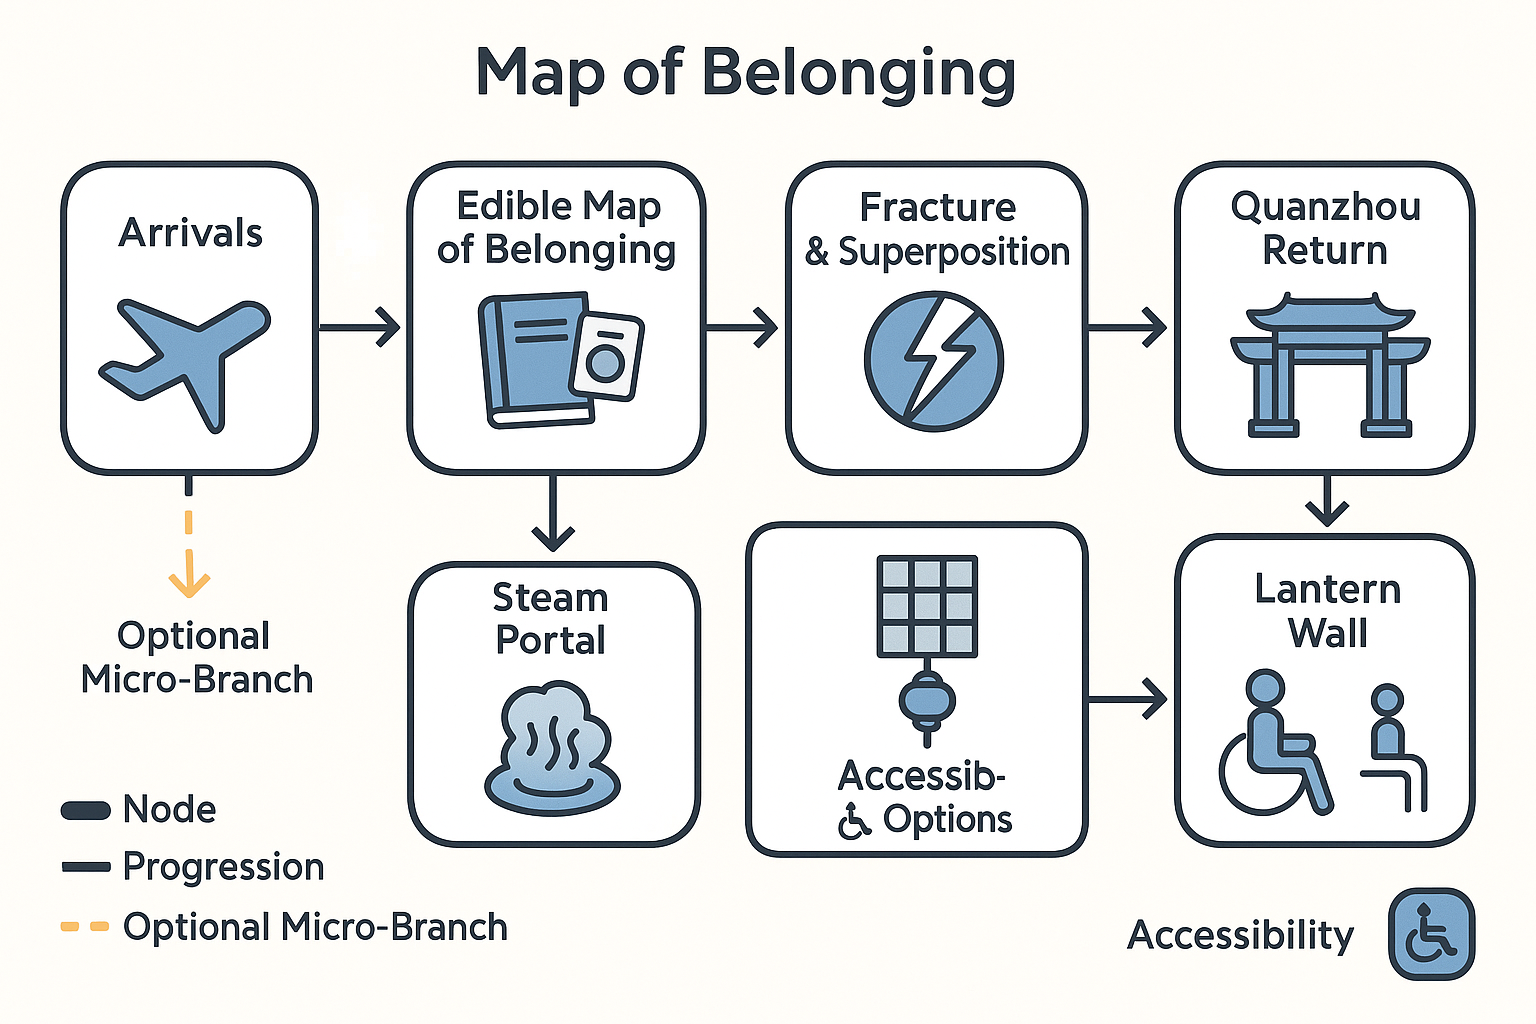


Figure #. A Visual Summary Diagram generated by ChatGPT (GPT-5) of the human-AI co-creation process.


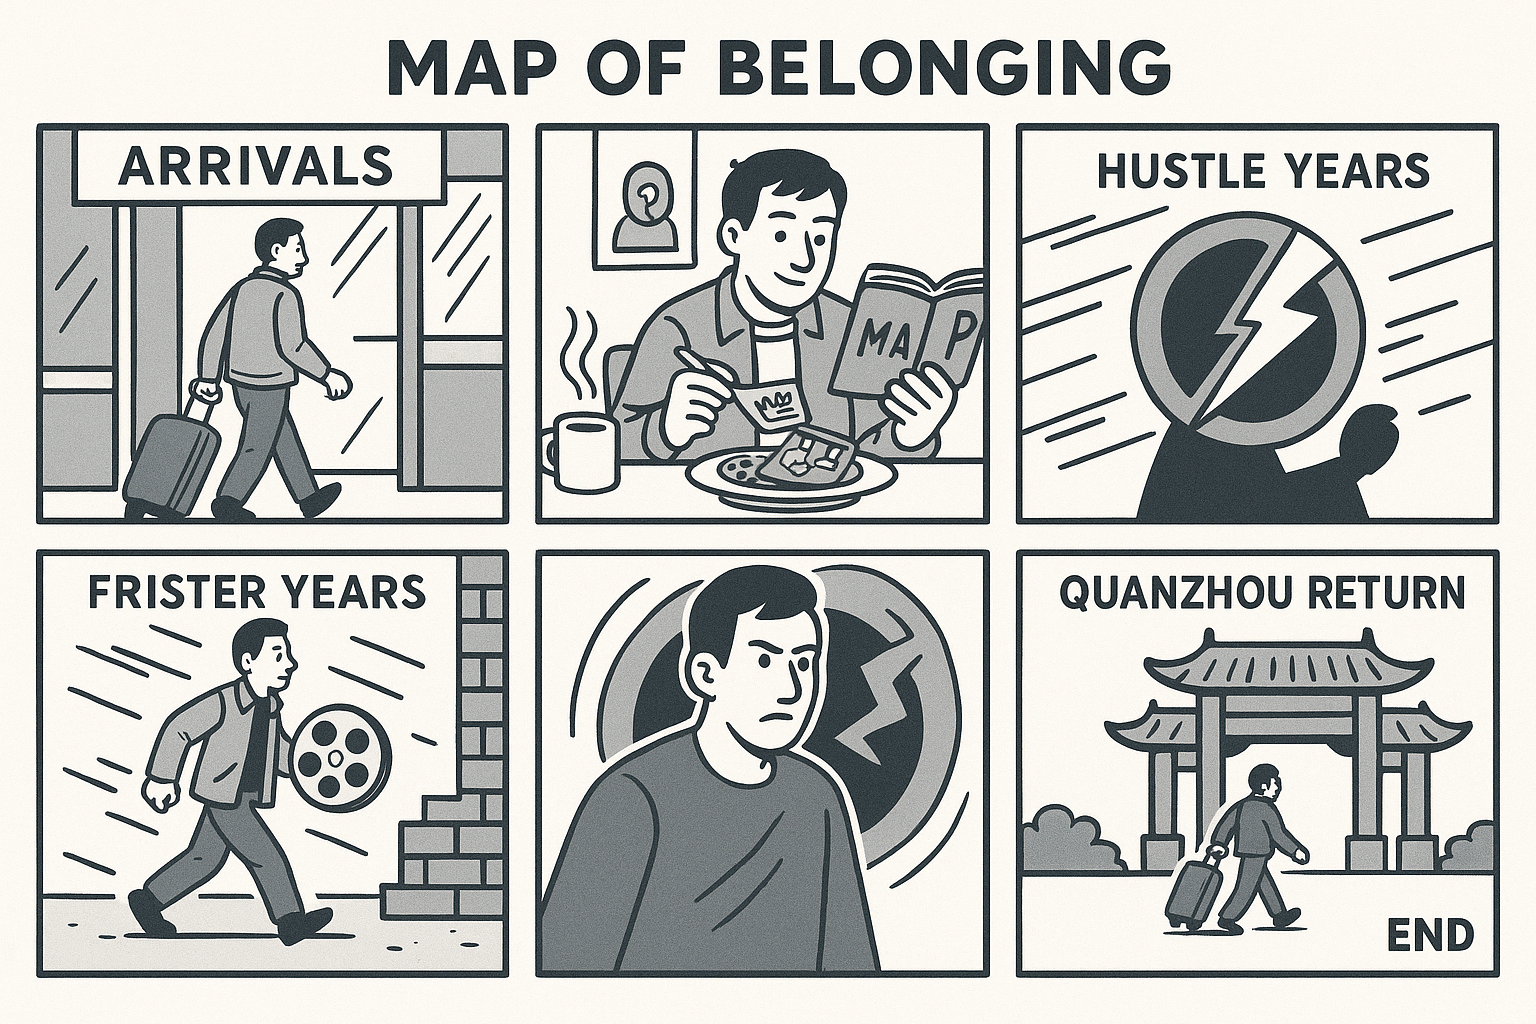


Figure #. A storyboard generated by ChatGPT (GPT-5) of the human-AI co-creation process.

## Appendix: Gemini’s Visualisation


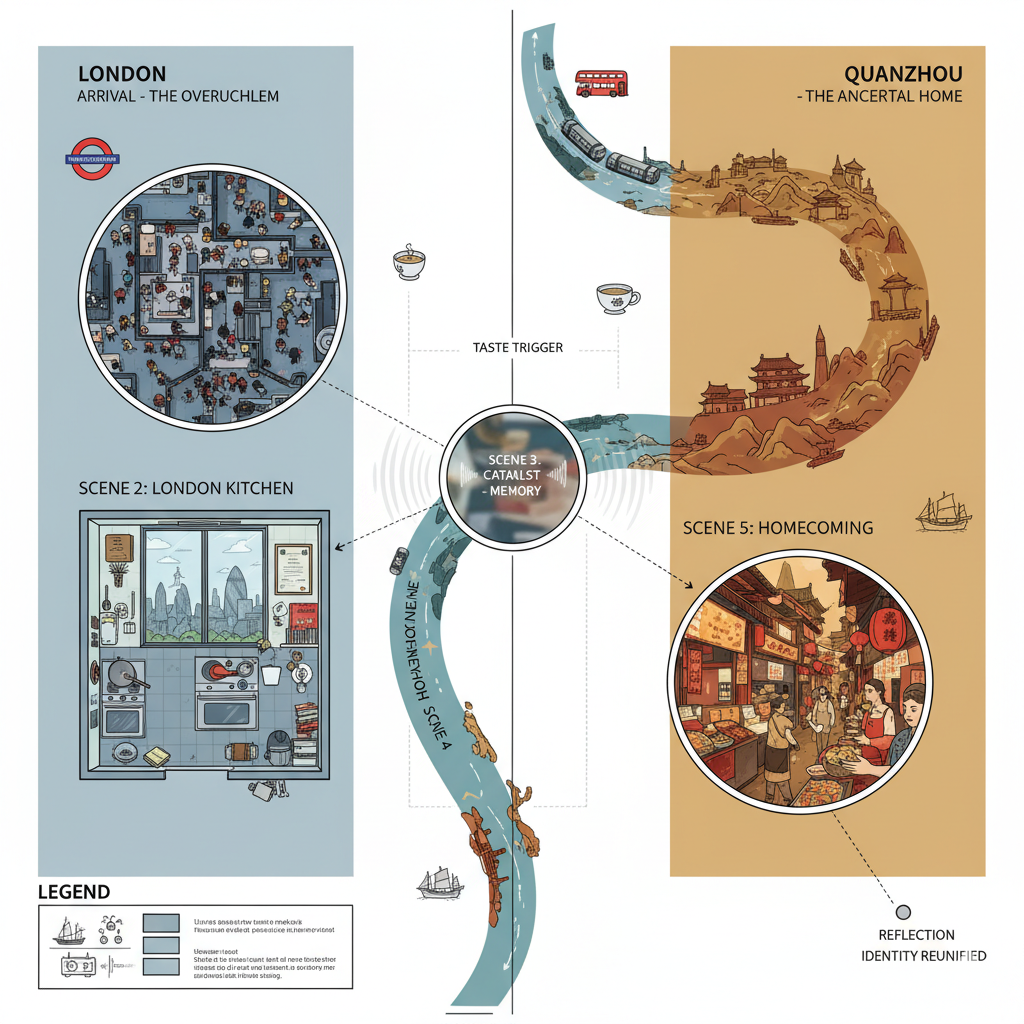


Figure #. A Visual Summary Diagram generated by Gemini (2.5) of the human-AI co-creation process.


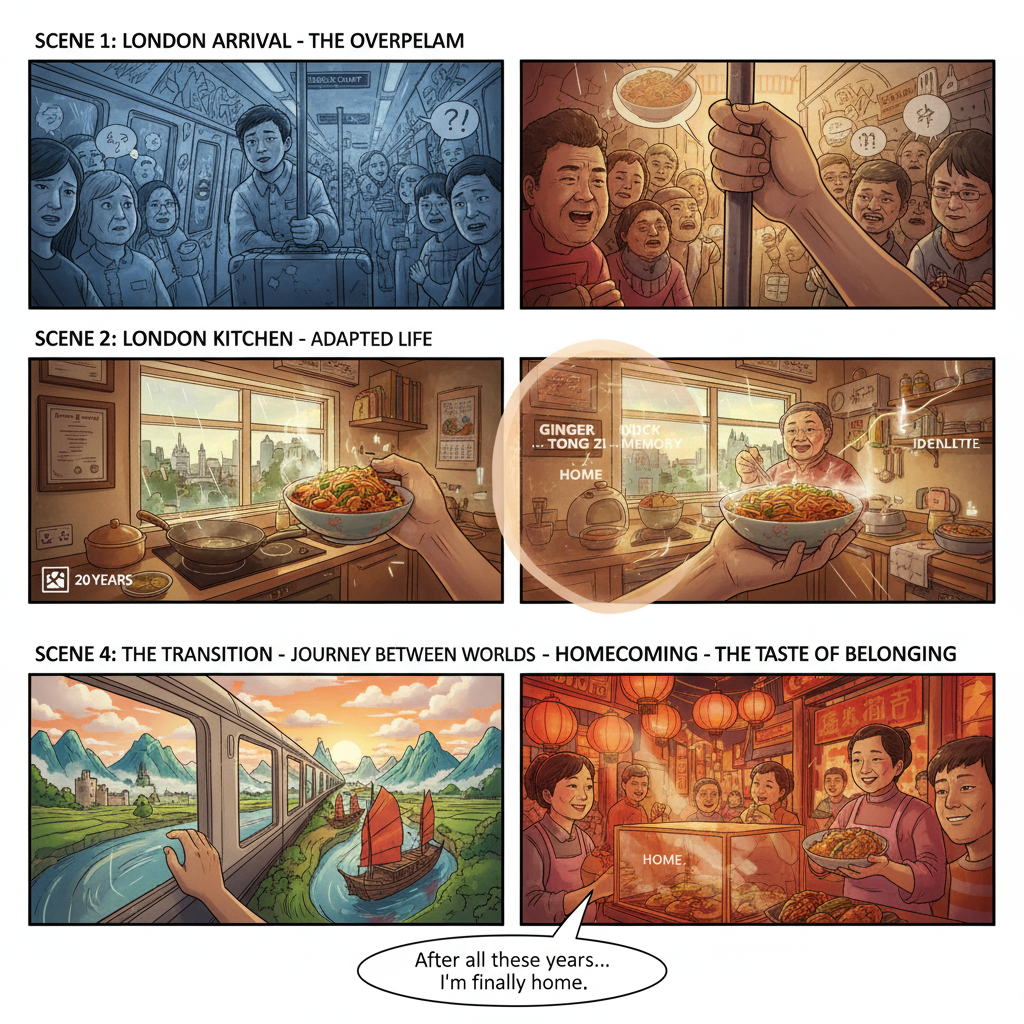


Figure #. A storyboard generated by Gemini (2.5) of the human-AI co-creation process.

## Appendix: DeepSeek’s Visualisation

Table #. DeepkSeek’s visual diagram and textual storyboard.

| **Scene 1: The Hustle & The Takeaway (London)**  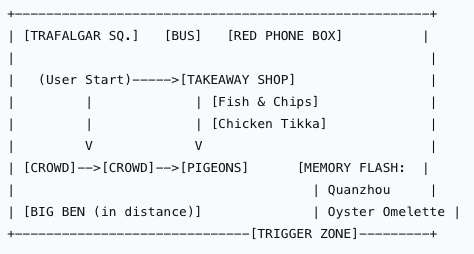  **User Path:** Linear path down a busy street. Picking up the takeaway triggers a brief, 2-second visual/sound flash of a Quanzhou night market.  **Scene 3: The Decision (Transition)**  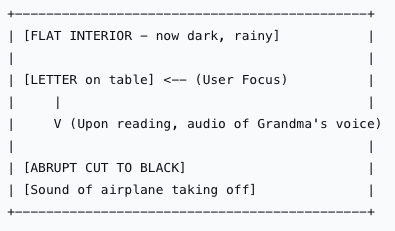  **User Path:** A static, narrative moment. The user reads the letter, triggering the audio and an abrupt scene change. | **Scene 2: The Flat & The Memory (London)**  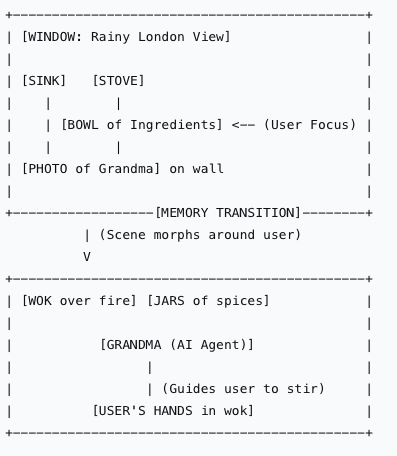  **User Path:** Free movement in a small room. Interaction with the bowl begins a seamless transition, blending the London flat into Grandma's kitchen. |
| --- | --- |
| **Scene 5: The Ancestral Temple (Quanzhou)**  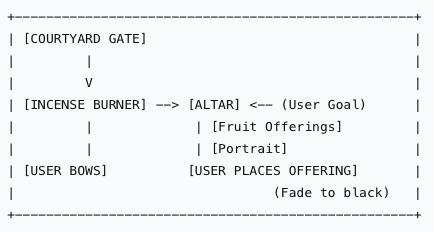  **User Path:** A slow, prescribed walk to the altar. The user performs two embodied interactions: a bowing gesture and placing an offering. | **Scene 4: The Return (Quanzhou)**  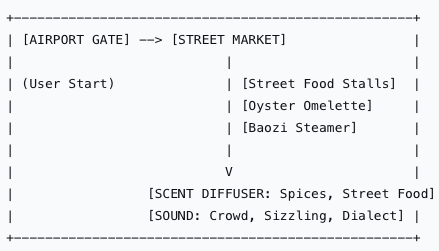  **User Path:** A short, room-scale walk from the arrival point into the vibrant market. The environment is designed for immediate sensory overload. |
| **Comic-Style Storyboard：** This storyboard captures the key emotional beats and visual composition of each scene.  **Panel 1 (Scene 1)**   - **Visual:** A low-angle, slightly distorted view looking up at a towering red London bus. The user's hand is visible, holding a greasy takeaway bag. The colors are cool and muted. - **Caption:** "The Hustle. Twenty years of routine..." - **Sound Effect:** "ROAR... HONK... *clatter of rain*"   **Panel 2 (Scene 1 - Memory Flash)**   - **Visual:** A transparent, ghostly overlay of a sizzling Quanzhou oyster omelette pan superimposes itself over the London street for just a moment. - **Caption:** "...punctuated by flashes of a different life." - **Sound Effect:** "SIZZLE..."   **Panel 3 (Scene 2)**   - **Visual:** Inside a modest London flat. The user's hands are on a bowl of ingredients. A faded photo of Grandma is on the wall. The light is warm but lonely. - **Caption:** "A quiet moment to prepare... to remember."   **Panel 4 (Scene 2 - Transition)**   - **Visual:** The kitchen walls around the user's hands dissolve, morphing into the earthy, warm tones of a traditional kitchen. The London bowl becomes a worn wooden one. - **Caption:** "…and the memory consumes you." - **Visual Effect:** **MORPH**   **Panel 5 (Scene 2 - Memory)**   - **Visual:** A stylized, kindly Grandma (AI agent) gestures with a smile, guiding the user's hands as they stir a pot in her kitchen. - **Dialogue (Grandma):** "A little more soy sauce, my child." - **Caption:** "The taste of home."   **Panel 6 (Scene 3)**   - **Visual:** A close-up on a handwritten letter, resting on the London table. A single raindrop hits the paper, blurring the ink. The background is dark and out of focus. - **Caption:** "The call to return." - **Sound Effect:** "*crack of thunder*"   **Panel 7 (Scene 4)**   - **Visual:** A wide, vibrant shot. The user steps from a shaded area into a sun-drenched Quanzhou market street. Stall awnings are red, steam rises from food, the crowd is a blur of life. - **Caption:** "The Return. Overwhelming. Familiar." - **Scent Icon:** 🍜 - **Sound Effect:** "CHATTER... SIZZLE... *unfamiliar dialect*"   **Panel 8 (Scene 5)**   - **Visual:** A low-angle, reverent shot from behind the user as they bow deeply before an ancestral altar, smoke from incense curling around them. - **Caption:** "The final ritual. A quiet reconciliation." - **Sound Effect:** "*silence*"   **Panel 9 (Scene 5 - Finale)**   - **Visual:** A first-person view of the user's hands gently placing a piece of fruit on the altar next to an old portrait. The scene slowly begins to fade to white. - **Caption:** "Home is not a place, but a feeling you carry. And then, you return it." - **Narrative V.O.:** "And I was home." | |
